# Supplementary material for: A novel AMPK activator shows therapeutic potential in hepatocellular carcinoma by suppressing HIF1α‐mediated aerobic glycolysis
Source: PubMed Central journal article supplement (PMC9168760; doi:10.1002/1878-0261.13211), 2022-04-12

# Supplementary Figure 1

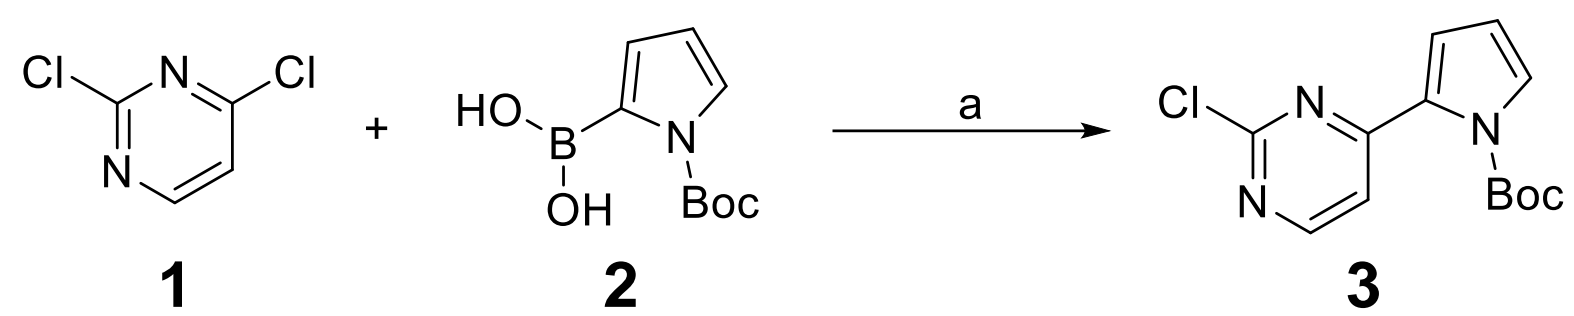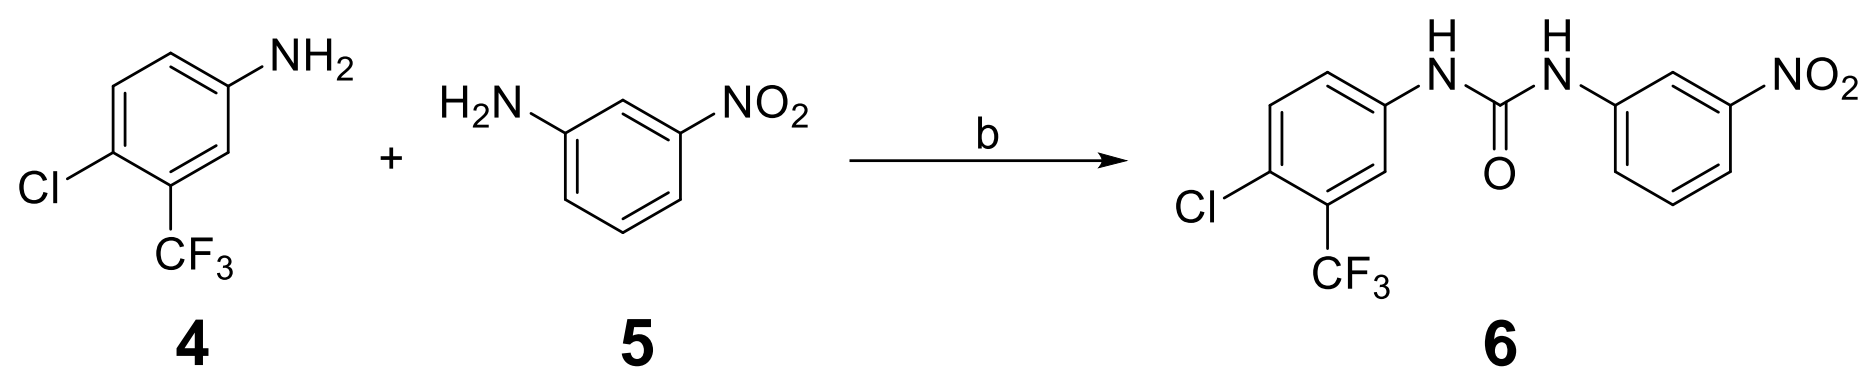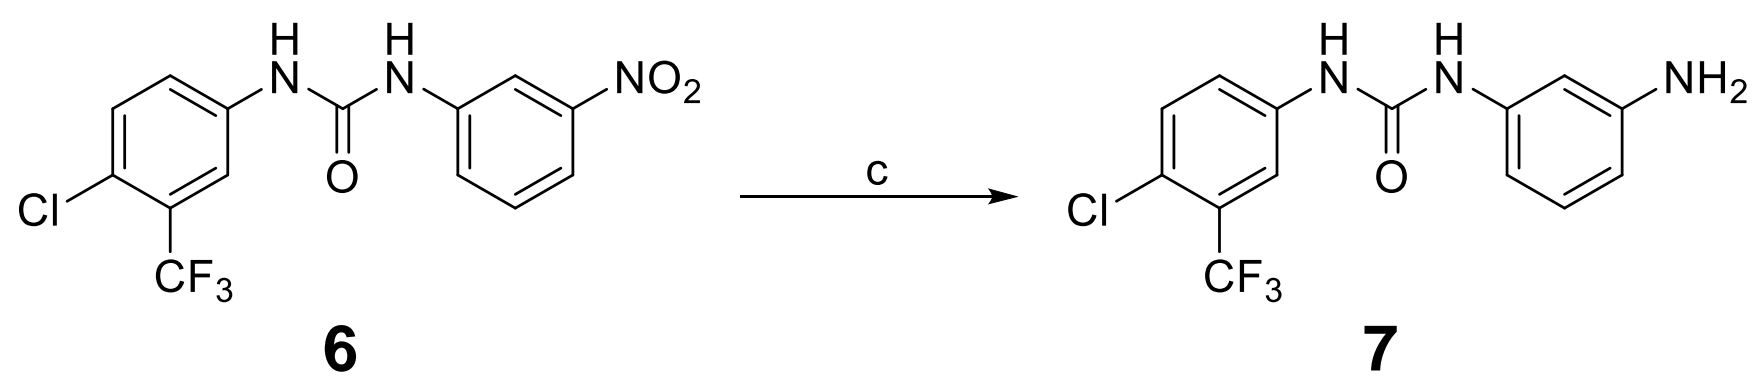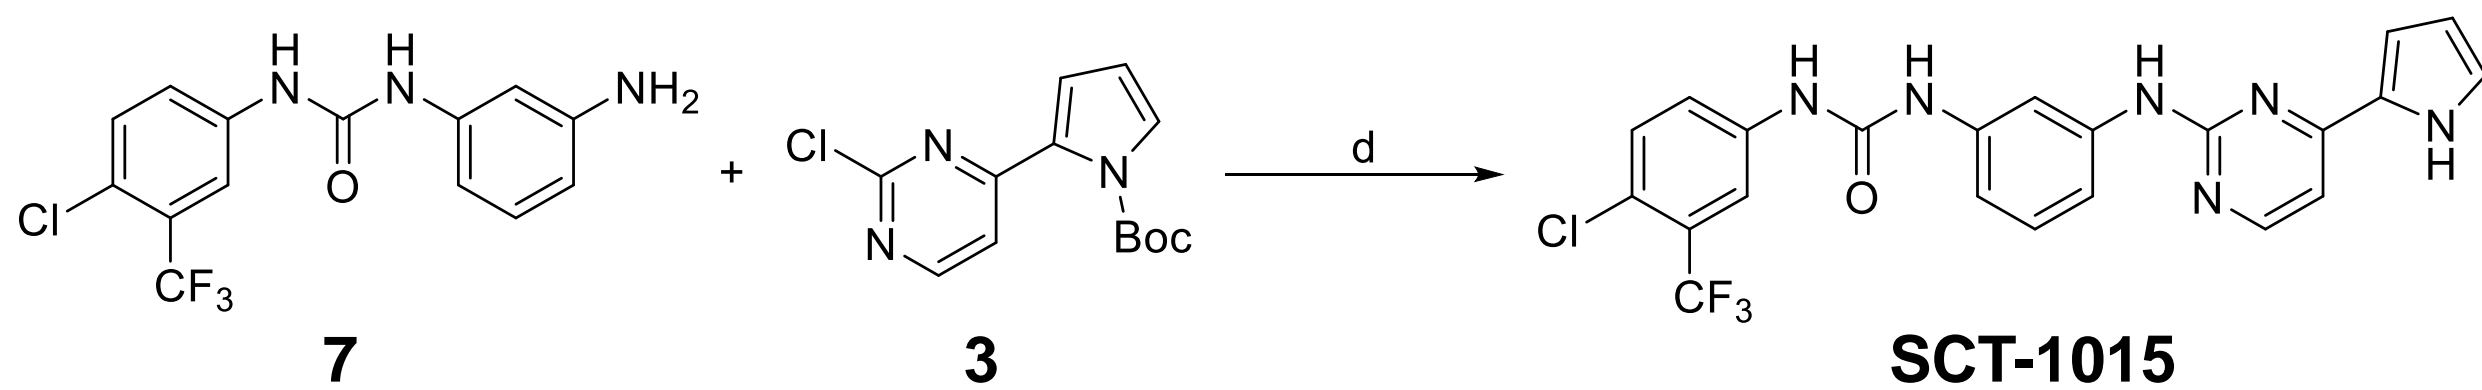

# Supplementary Figure 2

## A

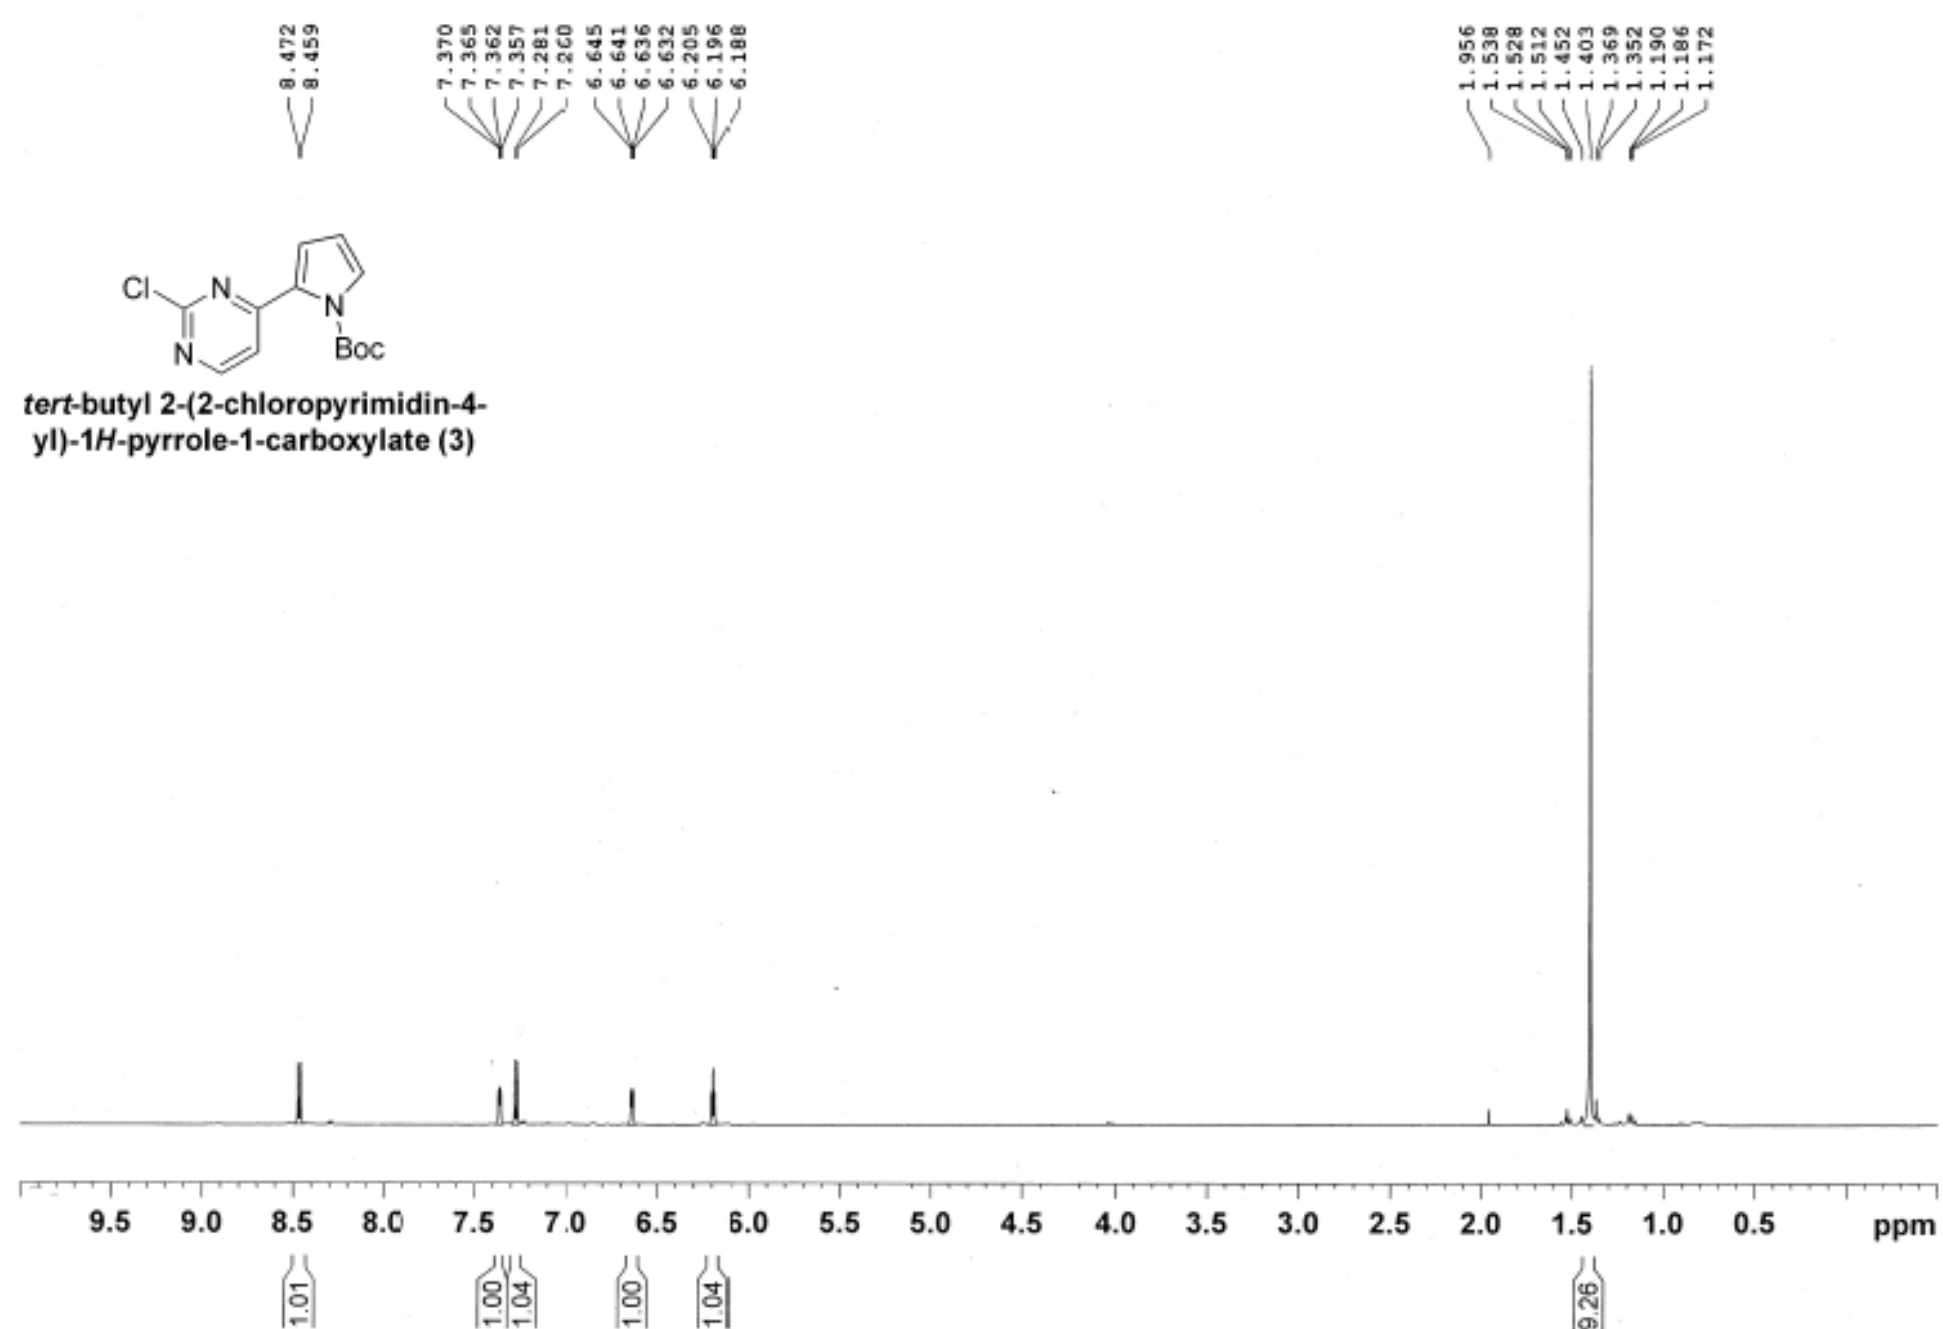

## B

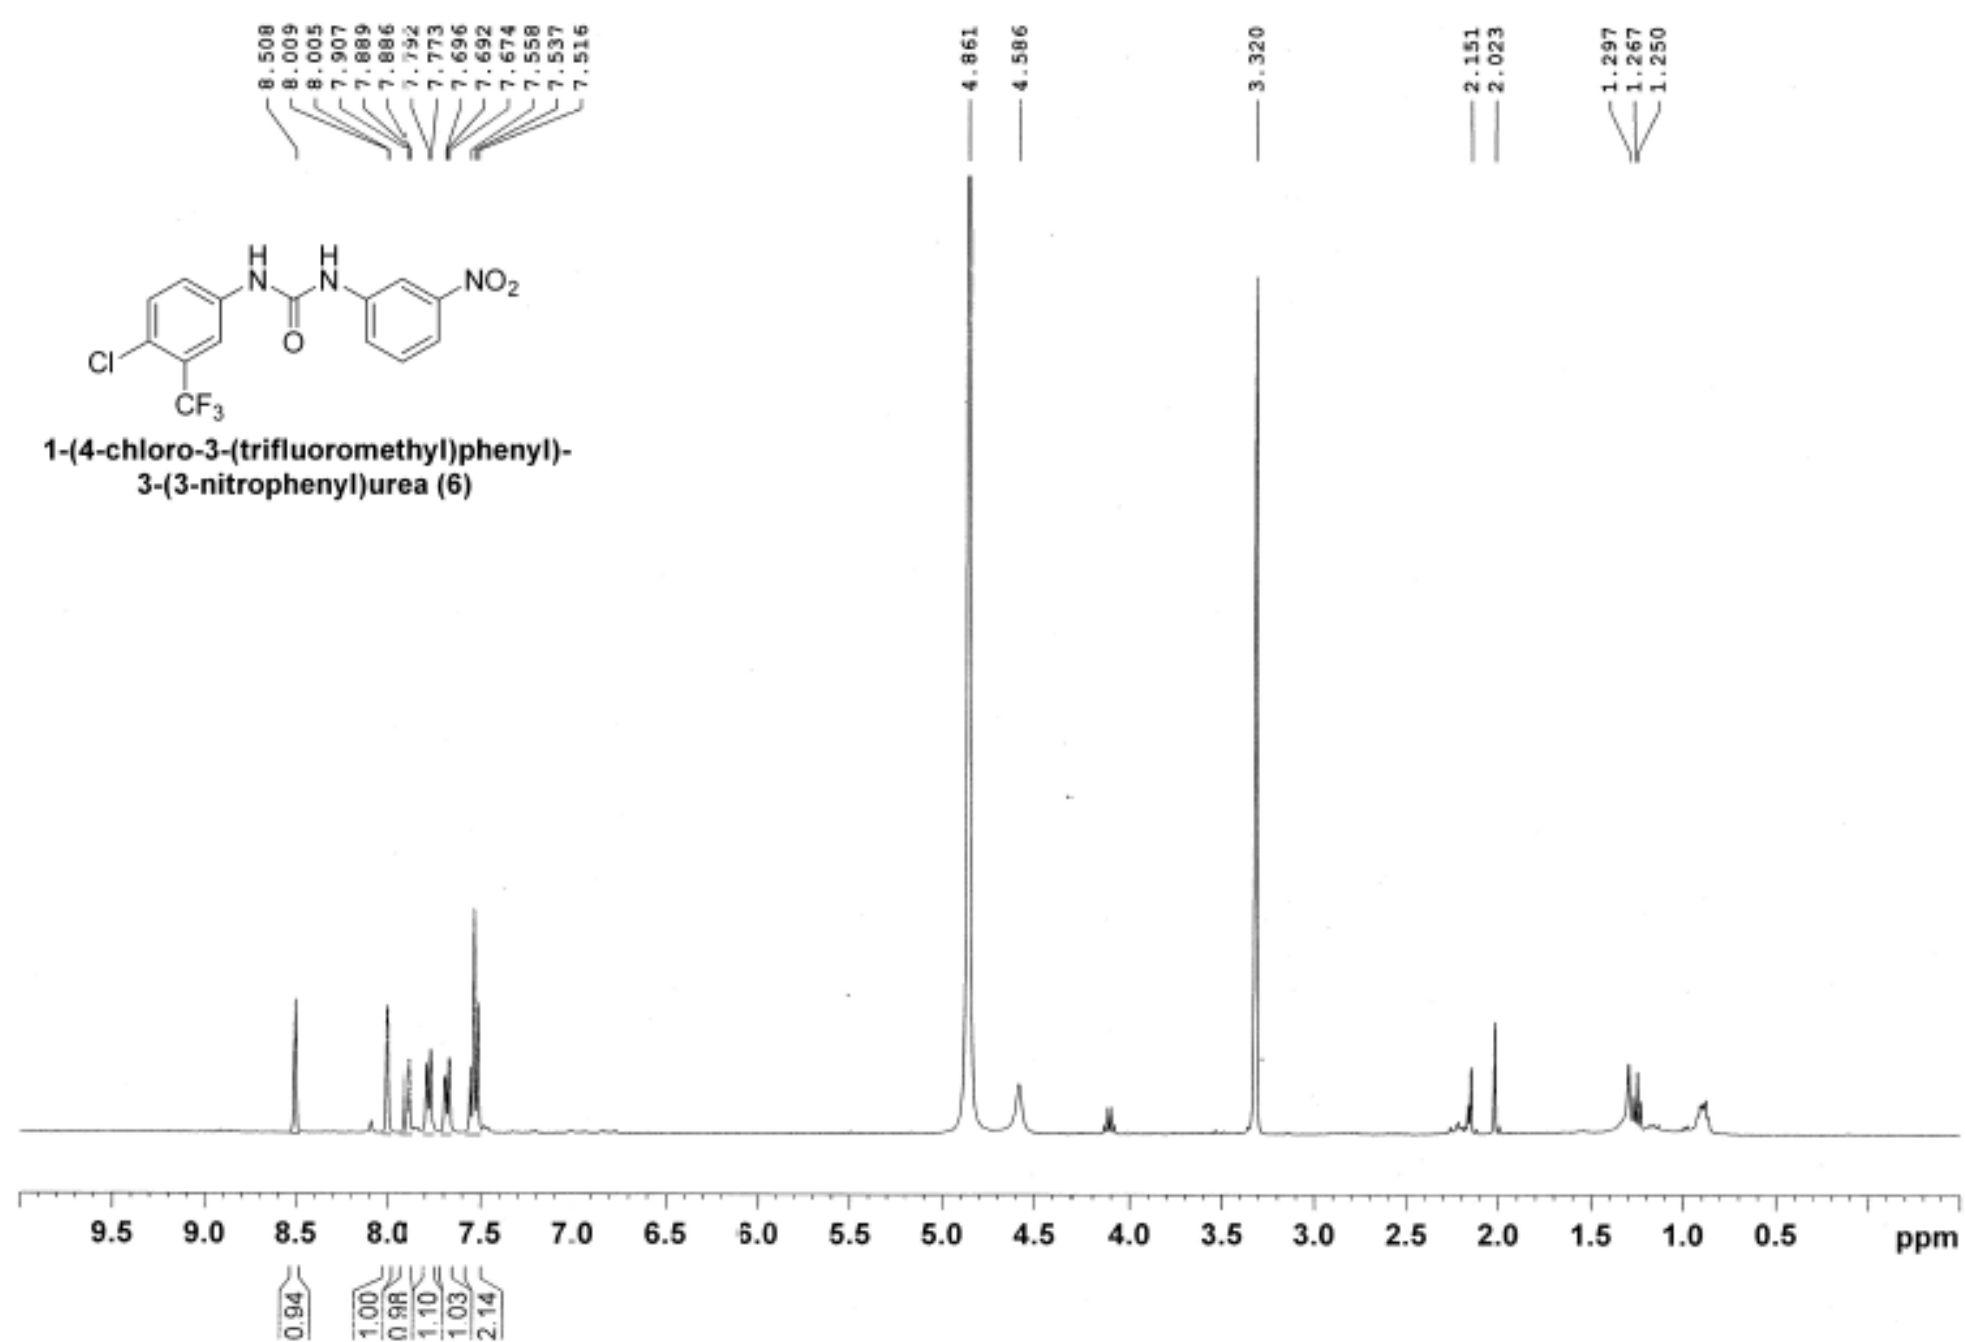

# Supplementary Figure 2

## C

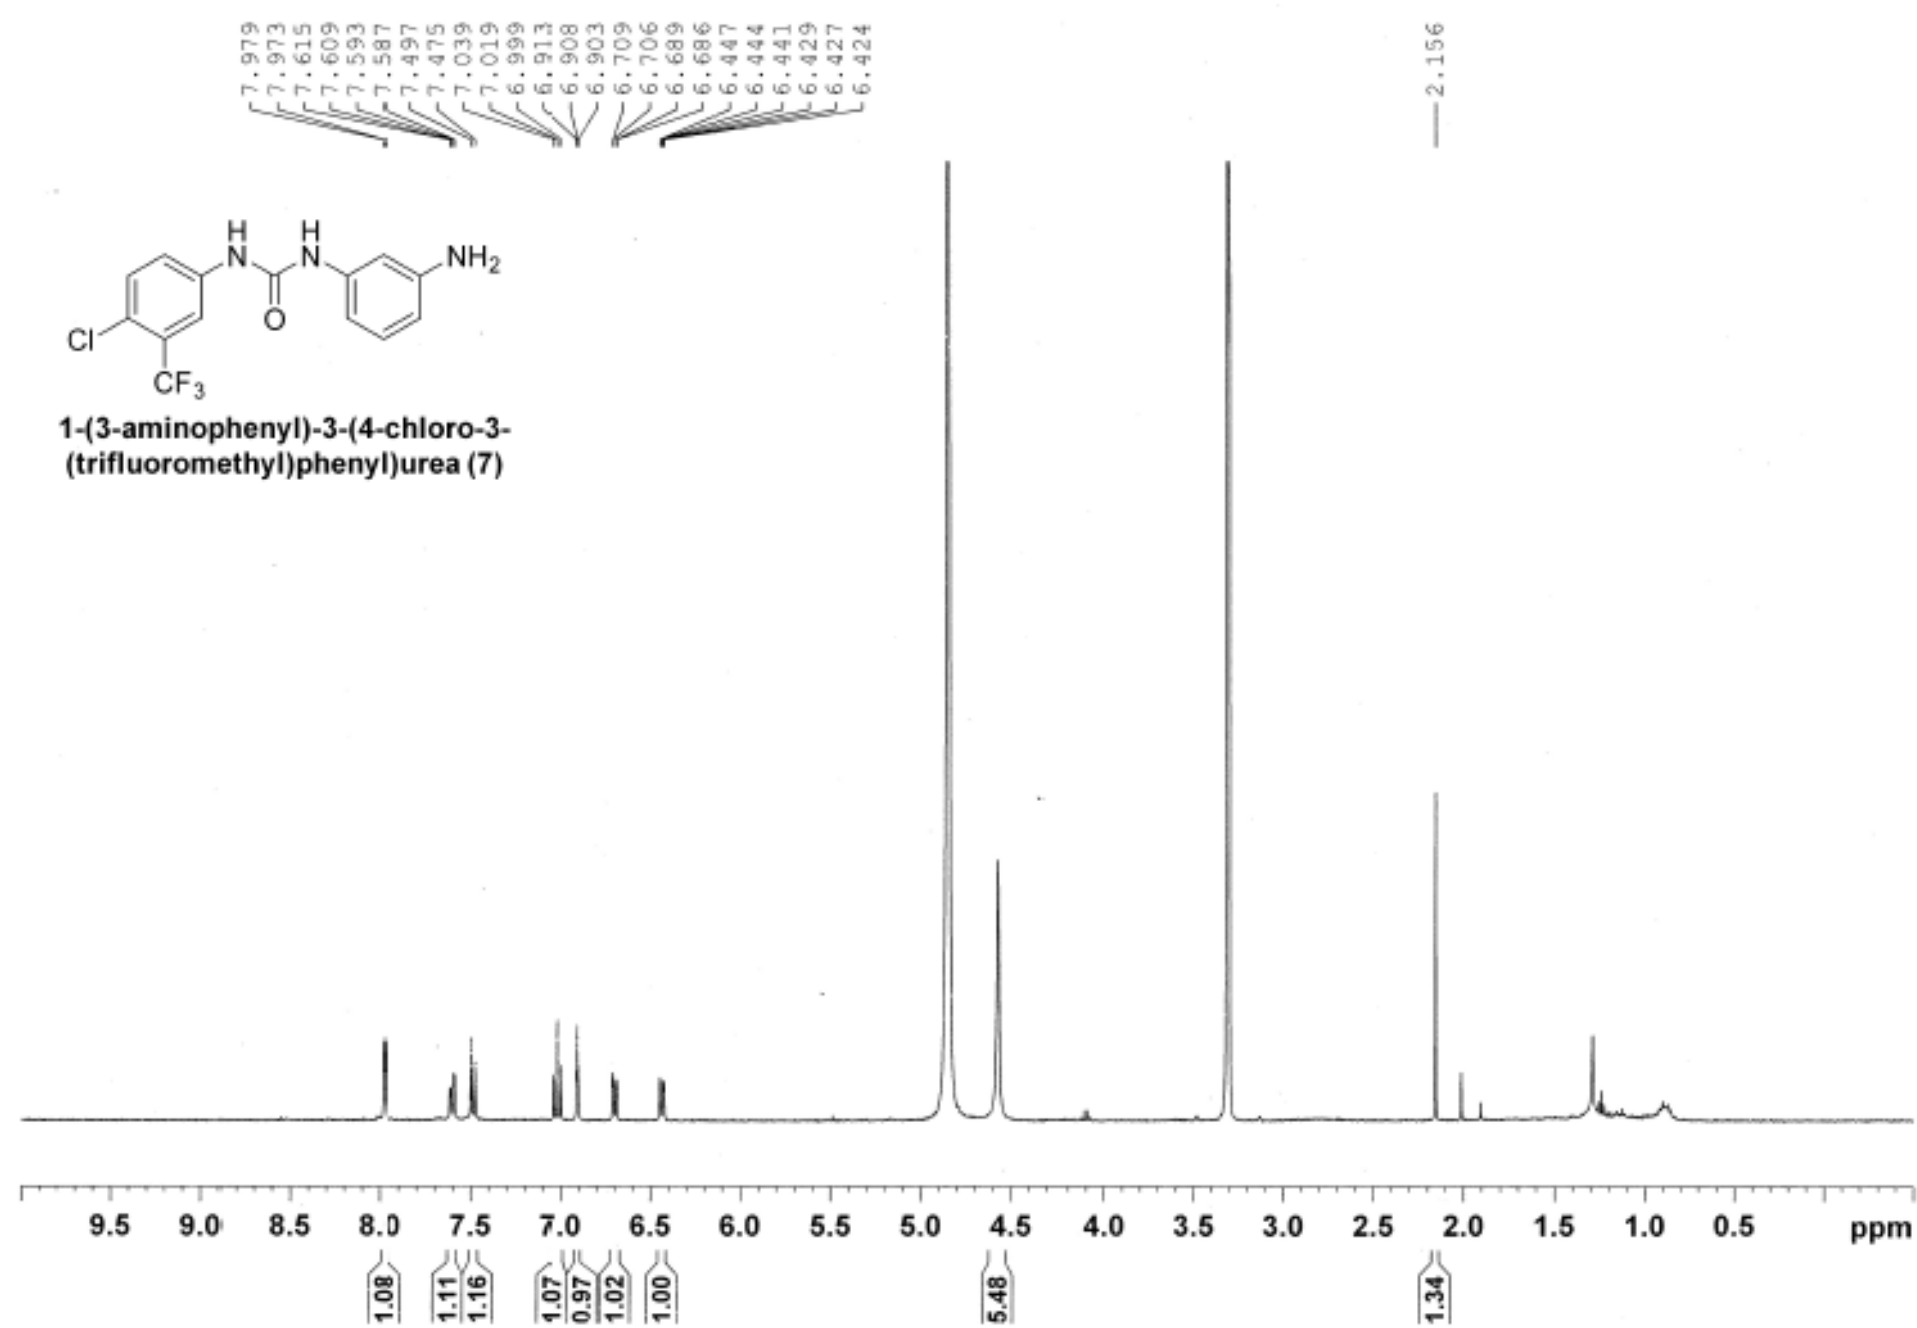

## D

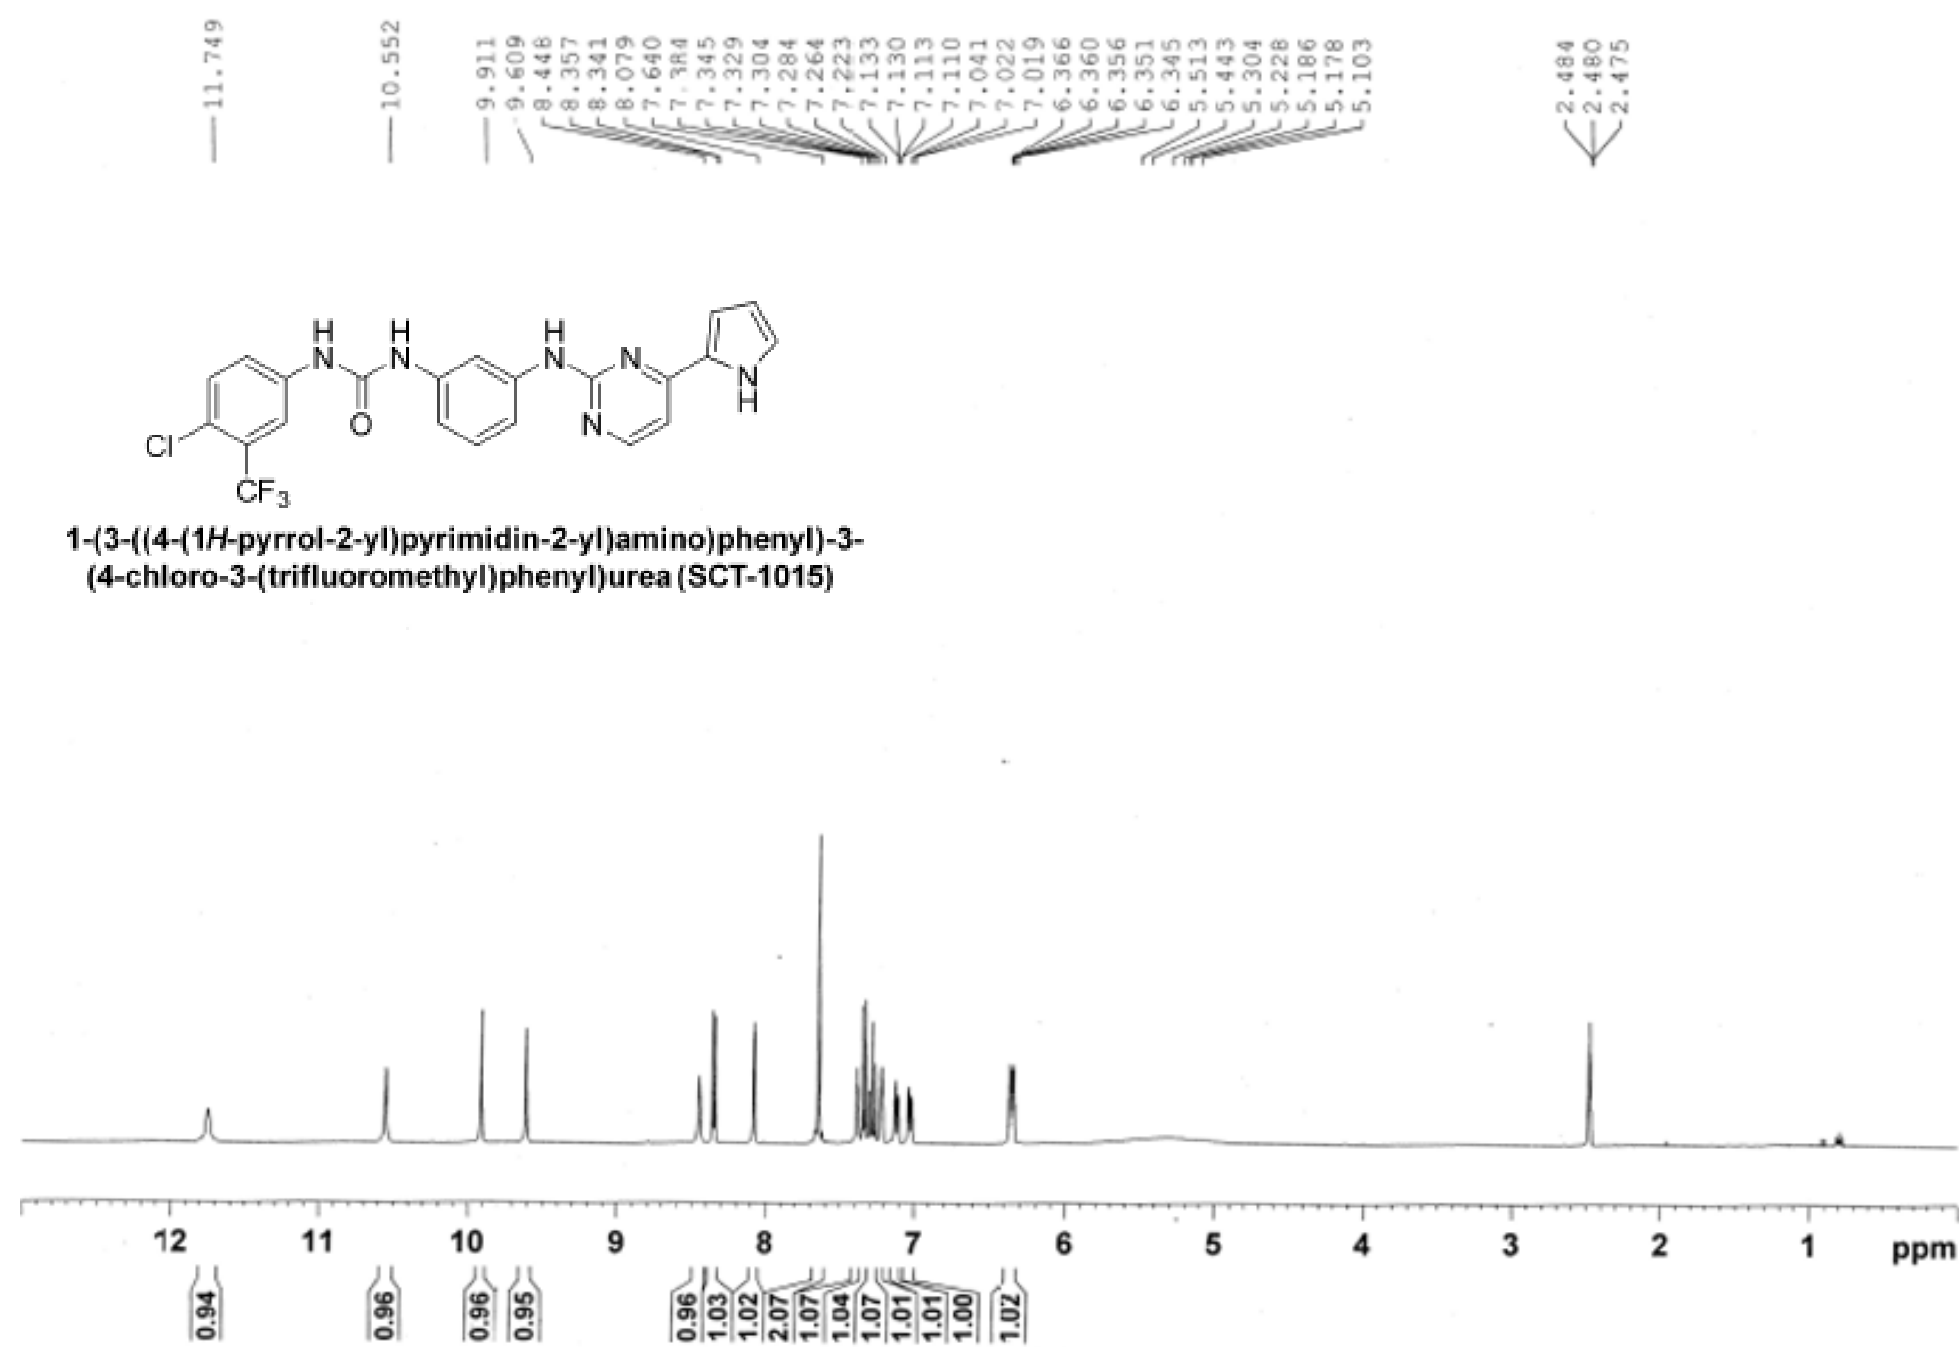

# Supplementary Figure 2

## E

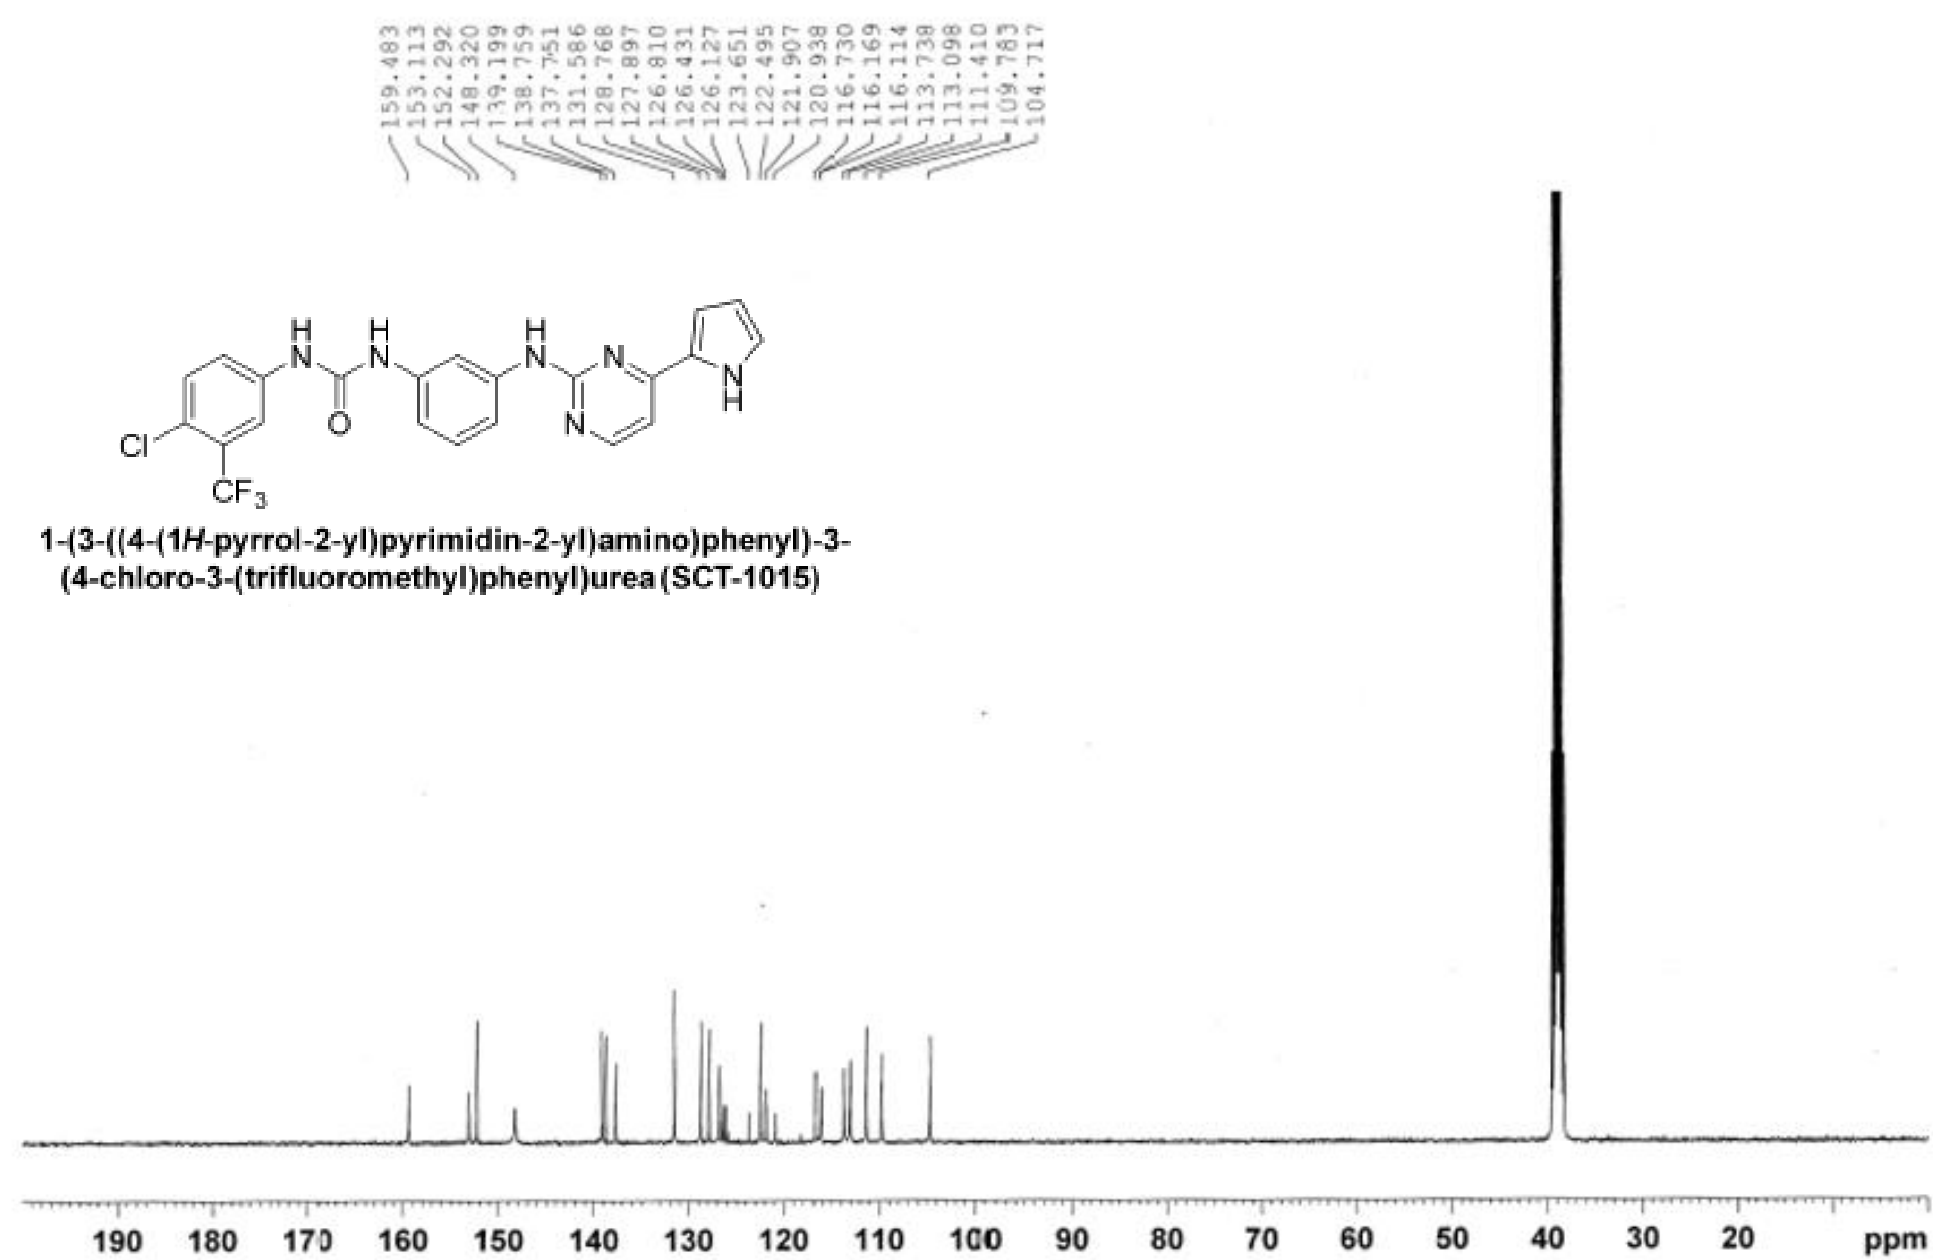

# Supplementary Figure 3

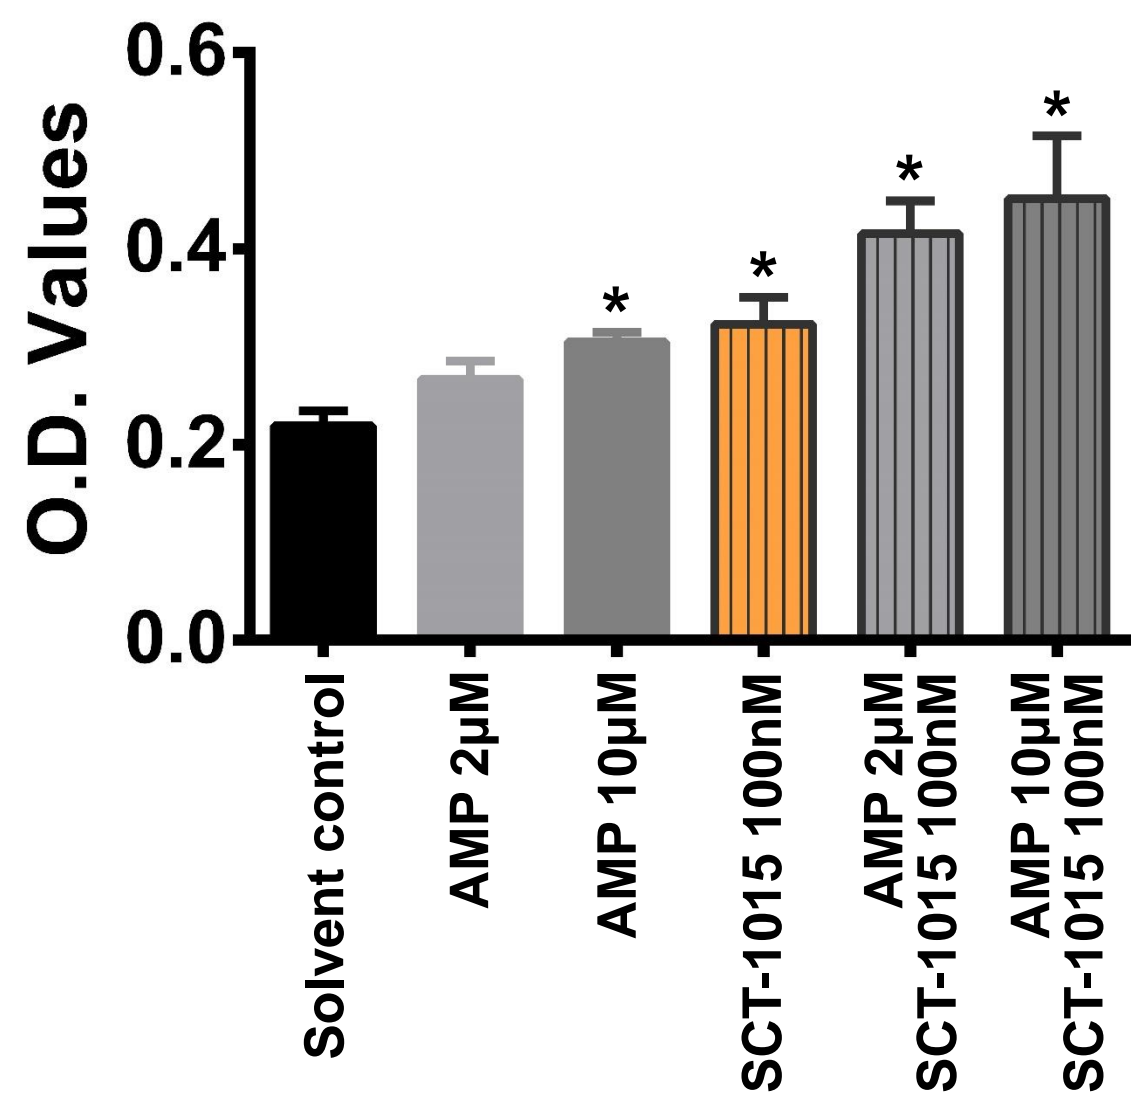

## Supplementary Figure 4

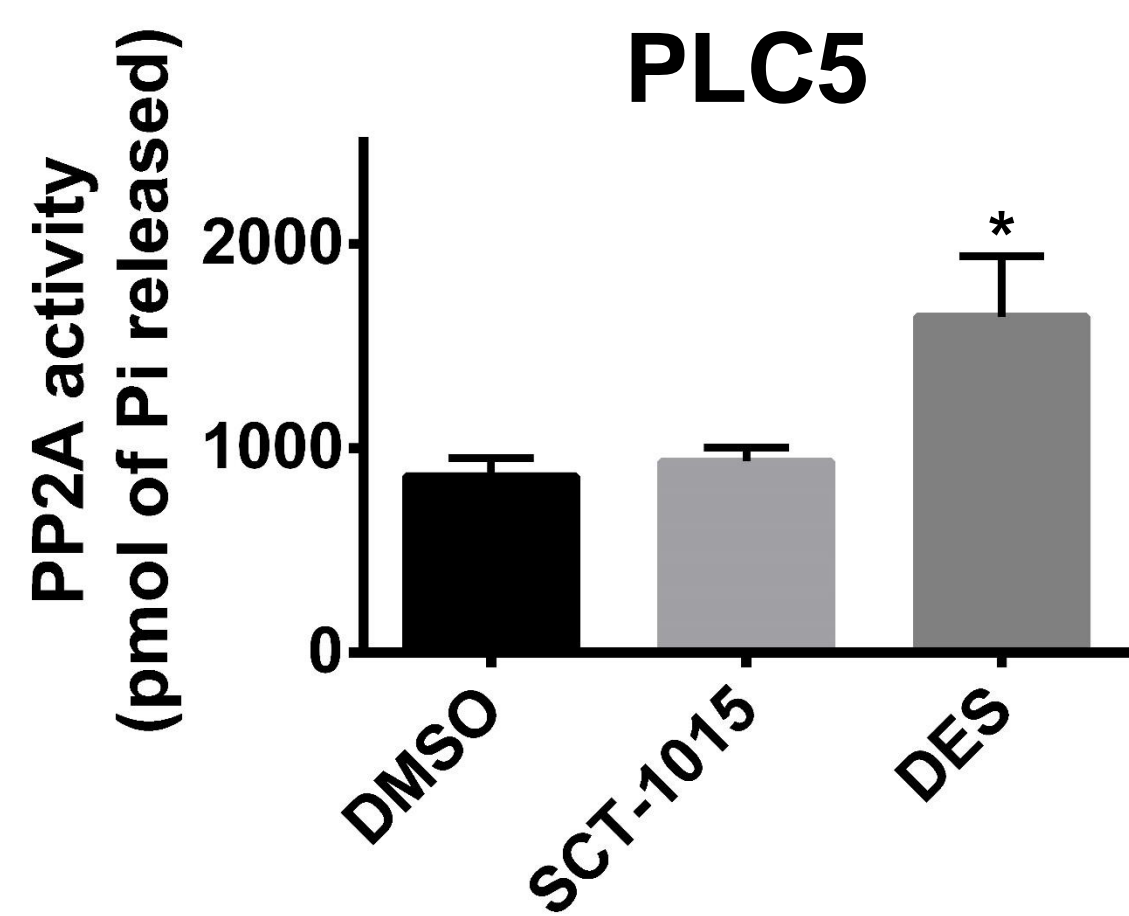

# Supplementary Figure 5

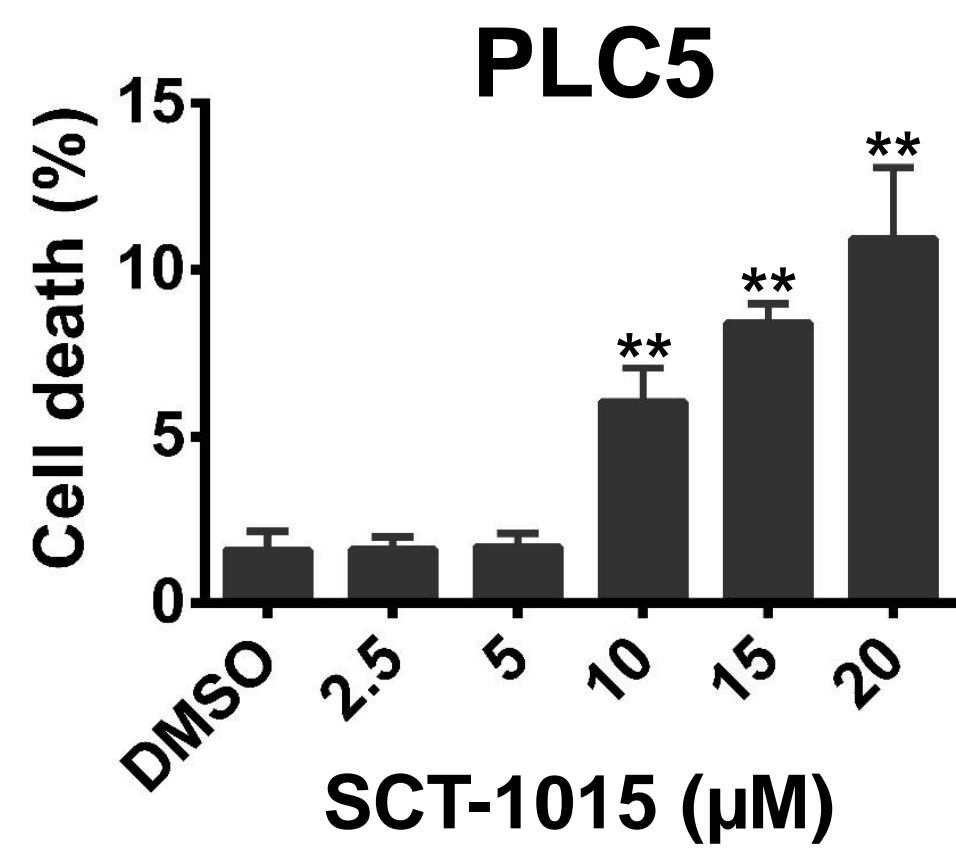

# Supplementary Figure 6

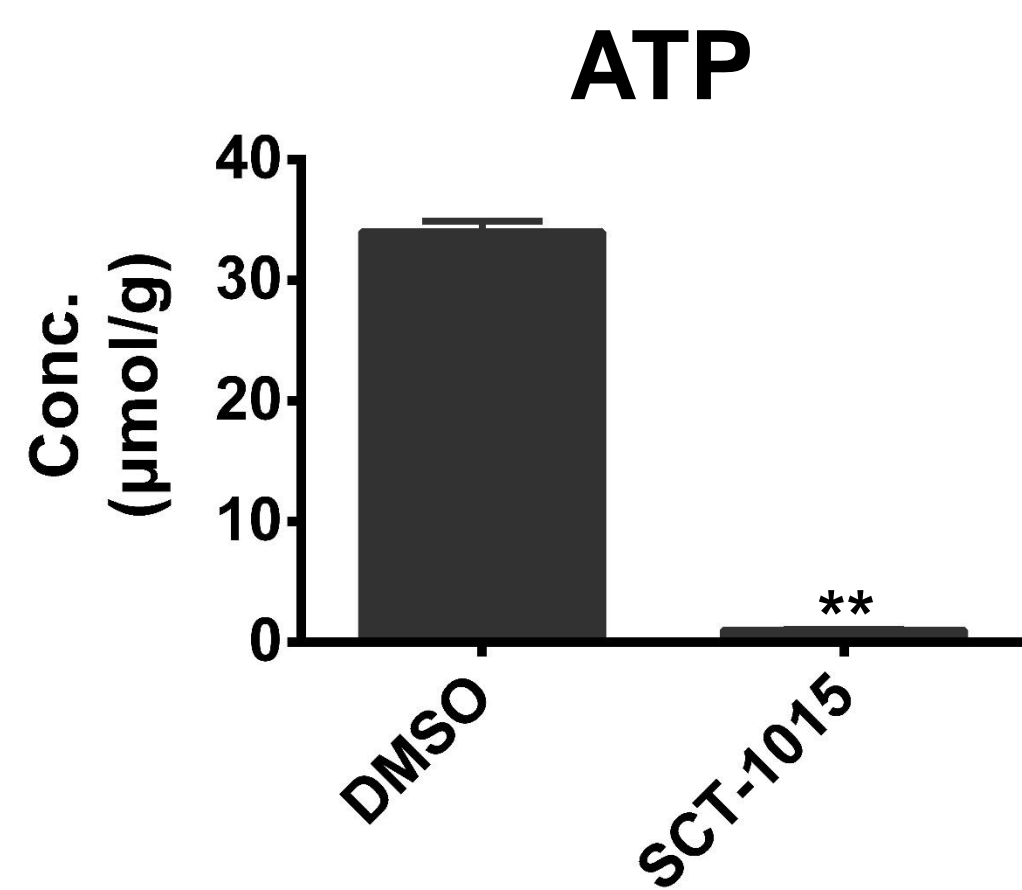



# Supplementary Figure 7

## A

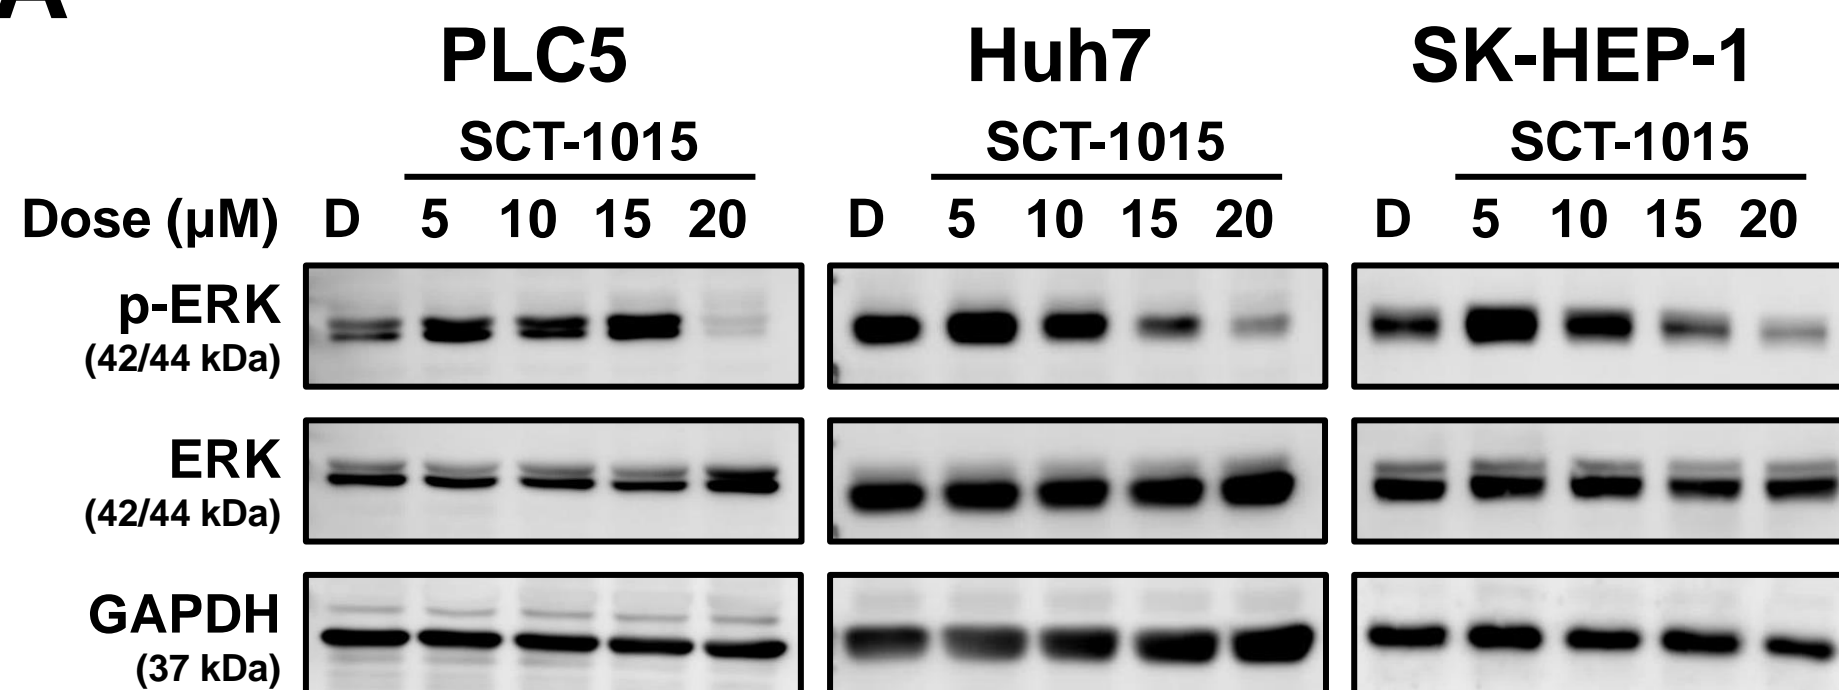

## B

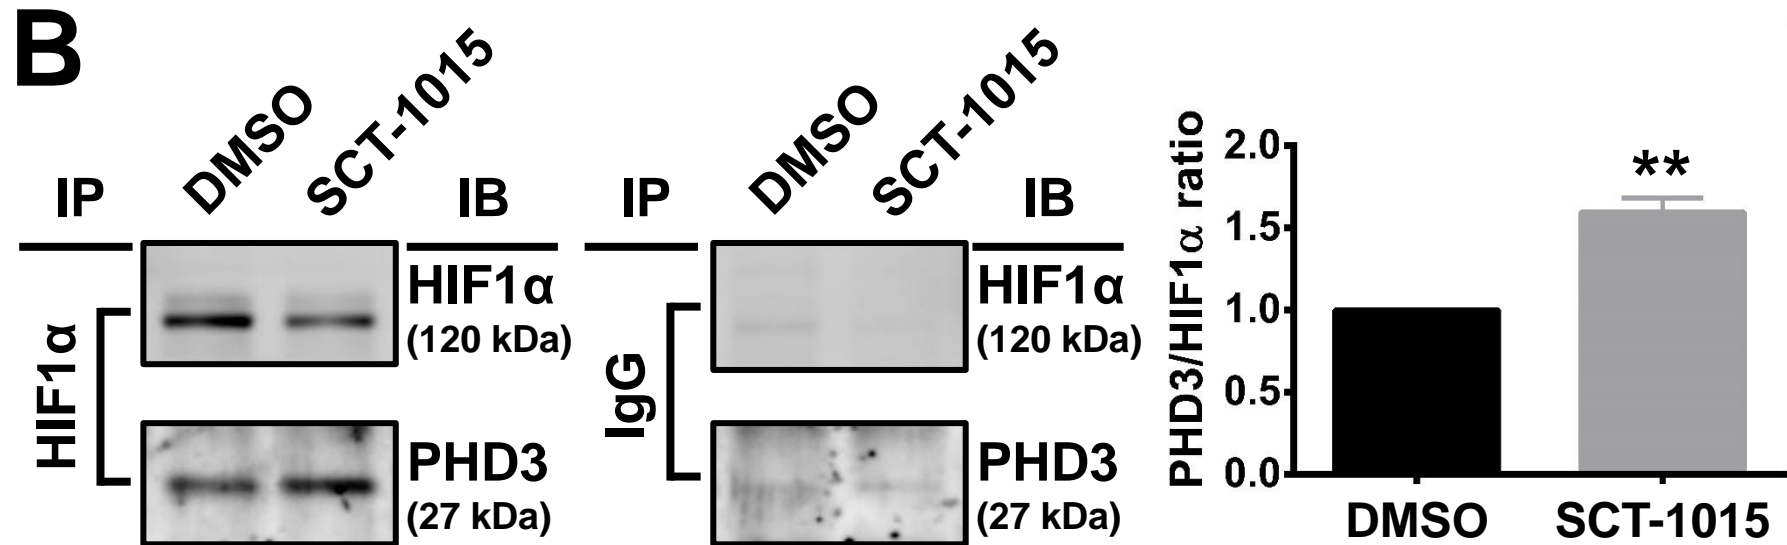

## C

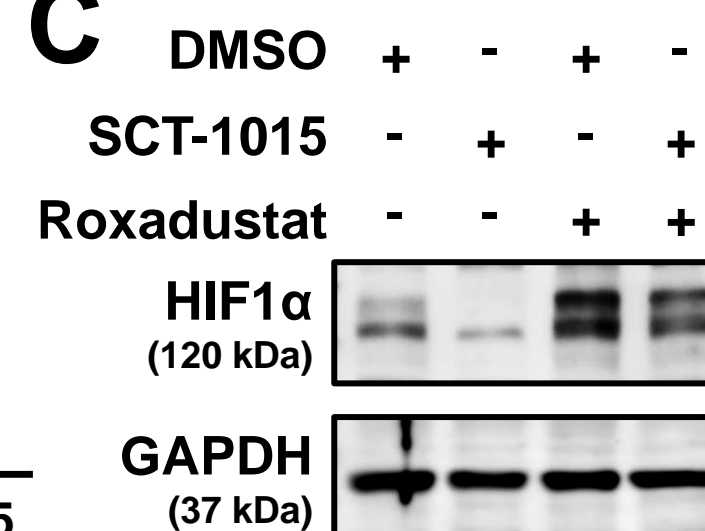

# Supplementary Figure 8

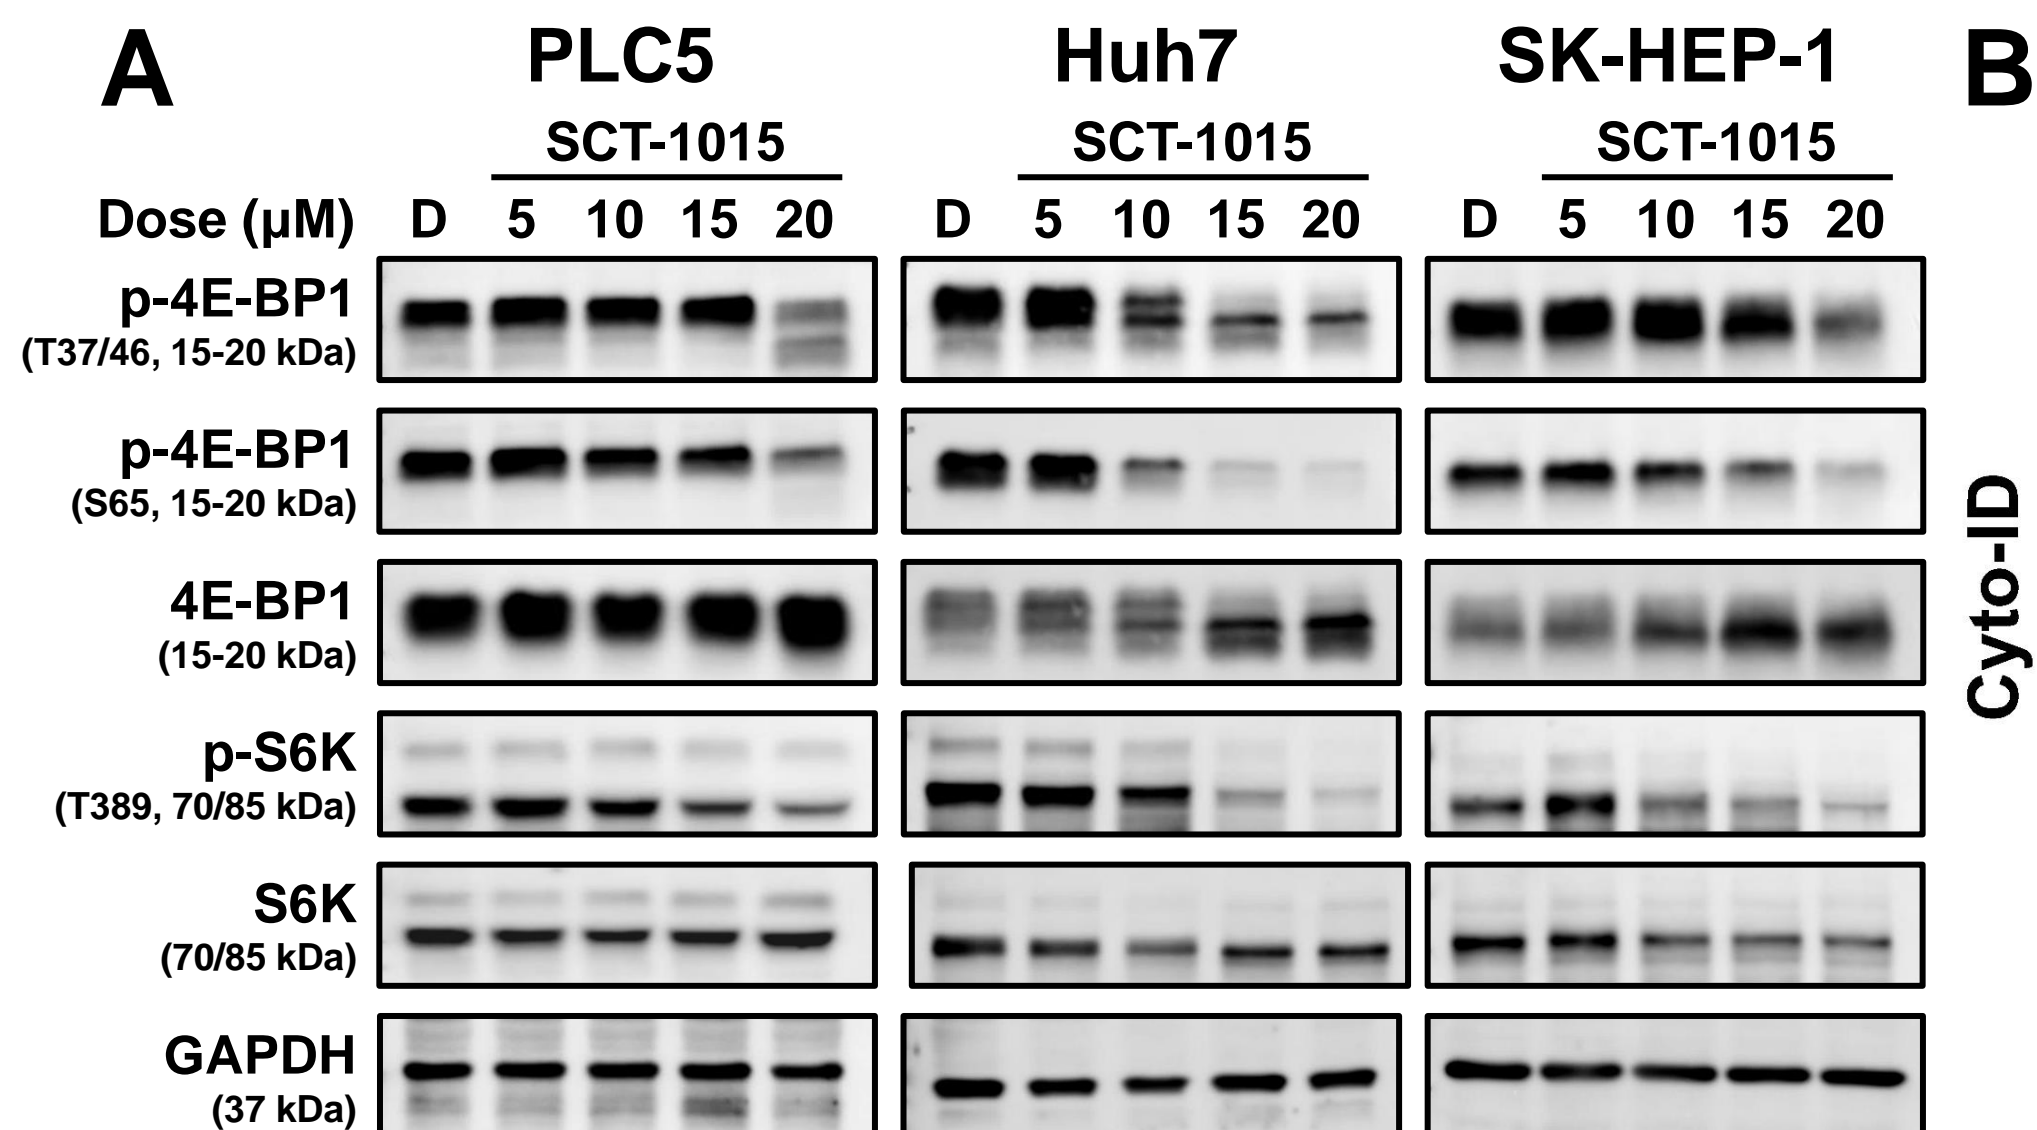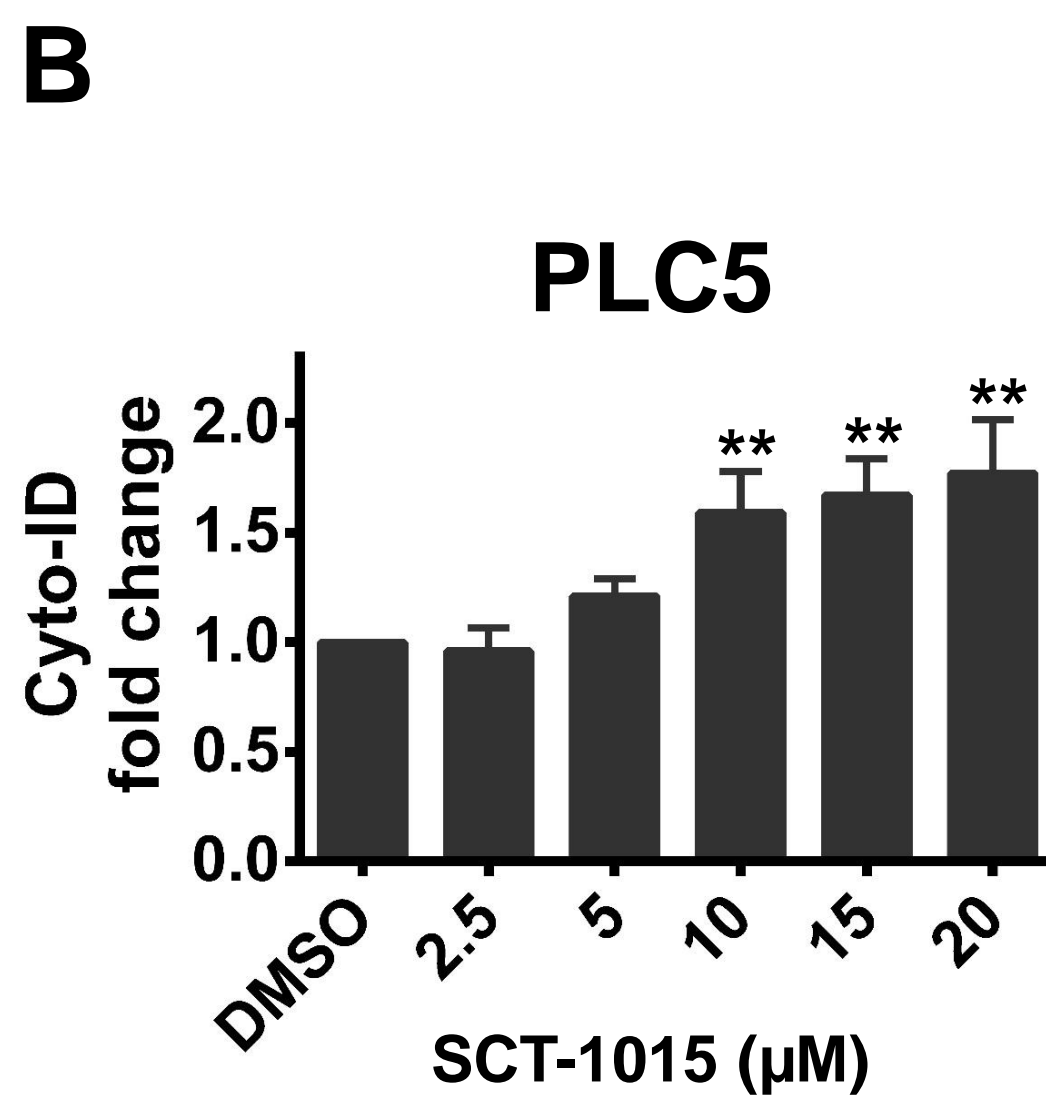

# Supplementary Figure 9

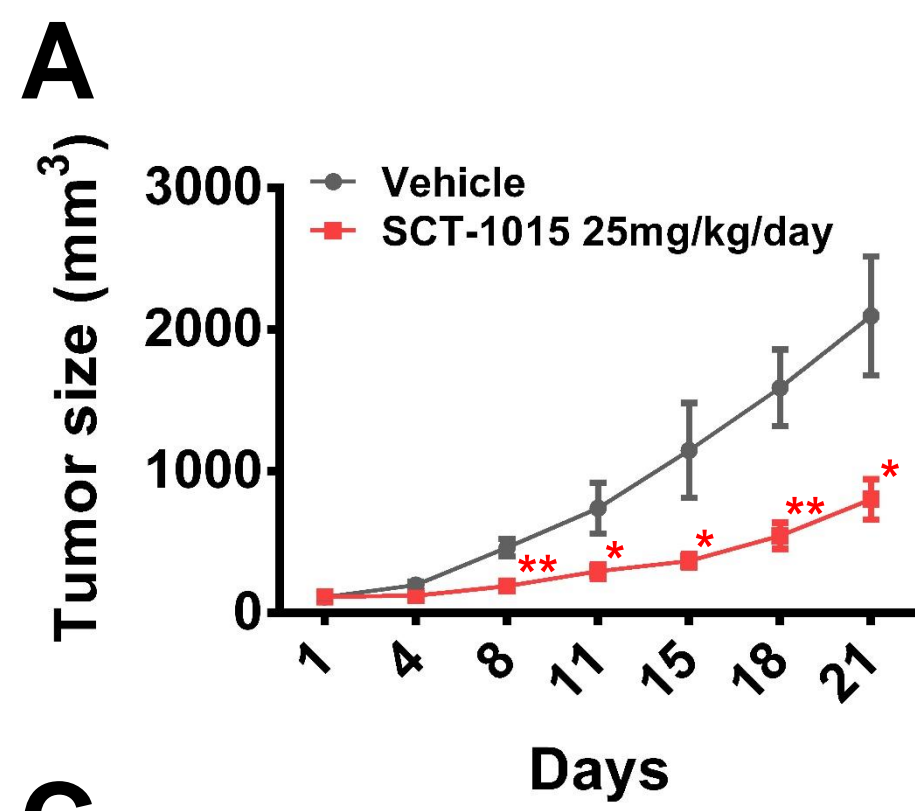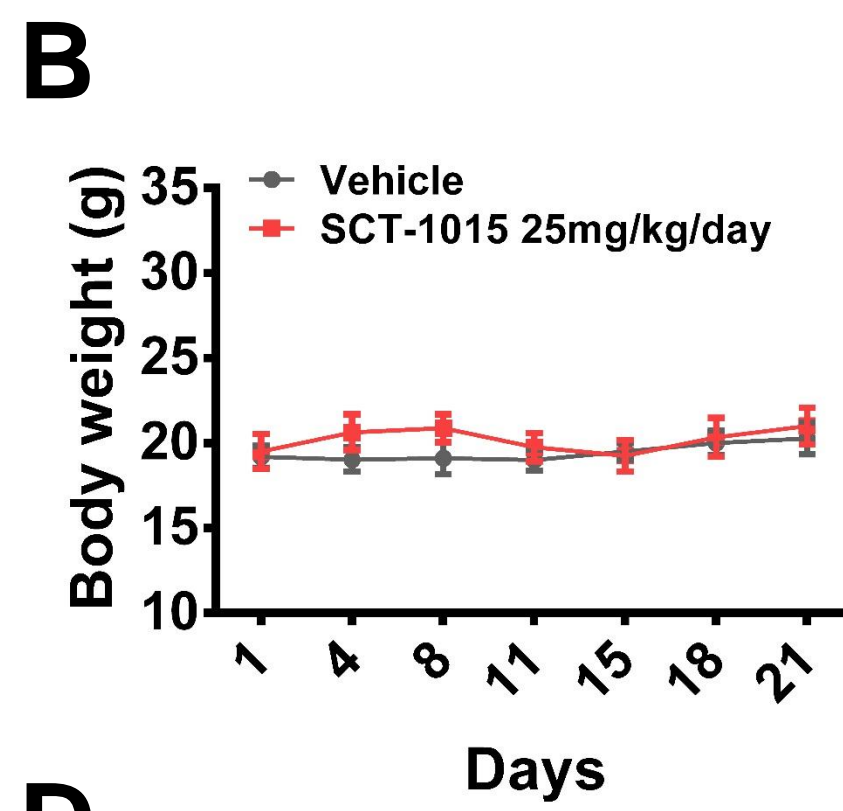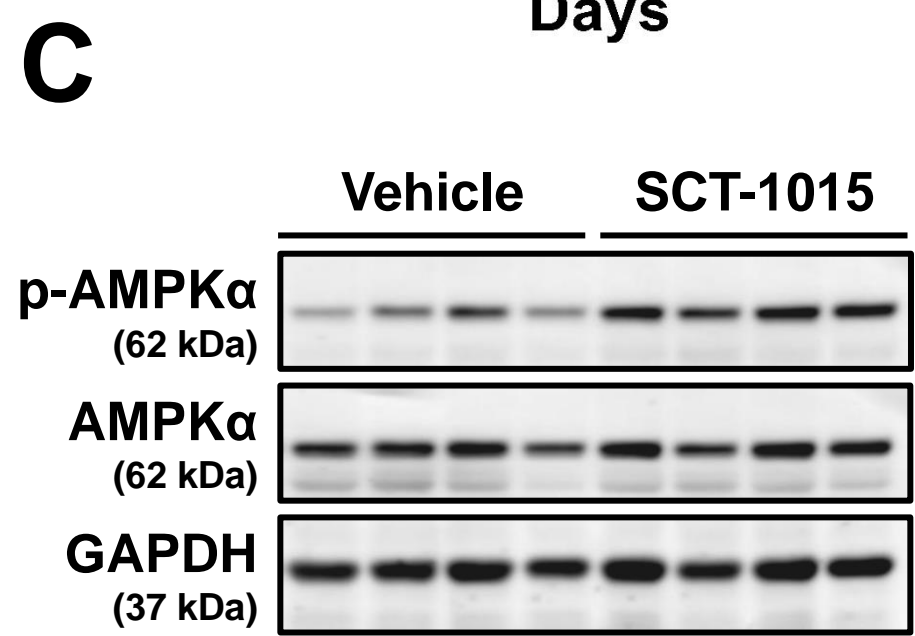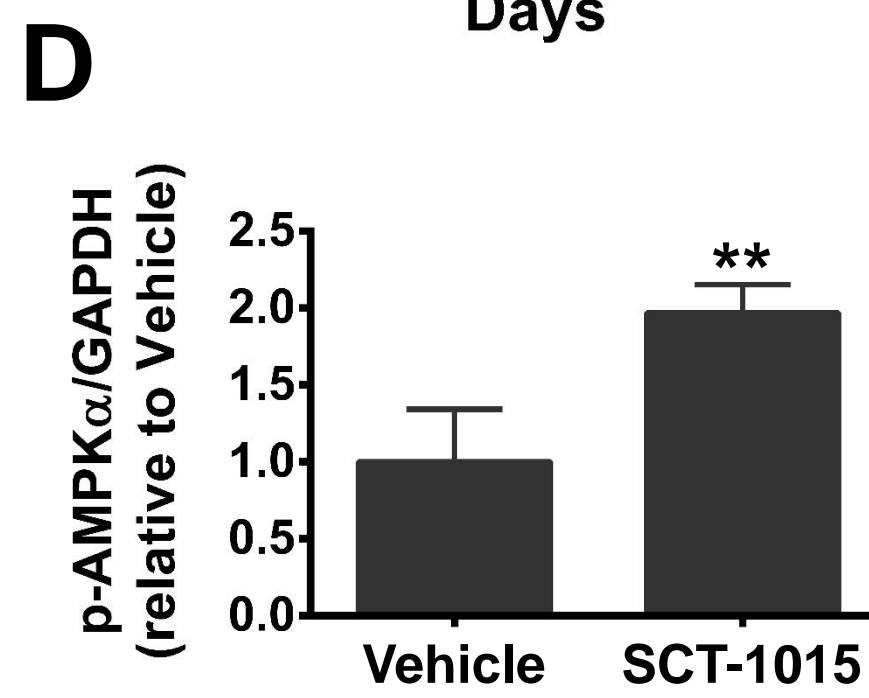

# Supplementary Figure 10

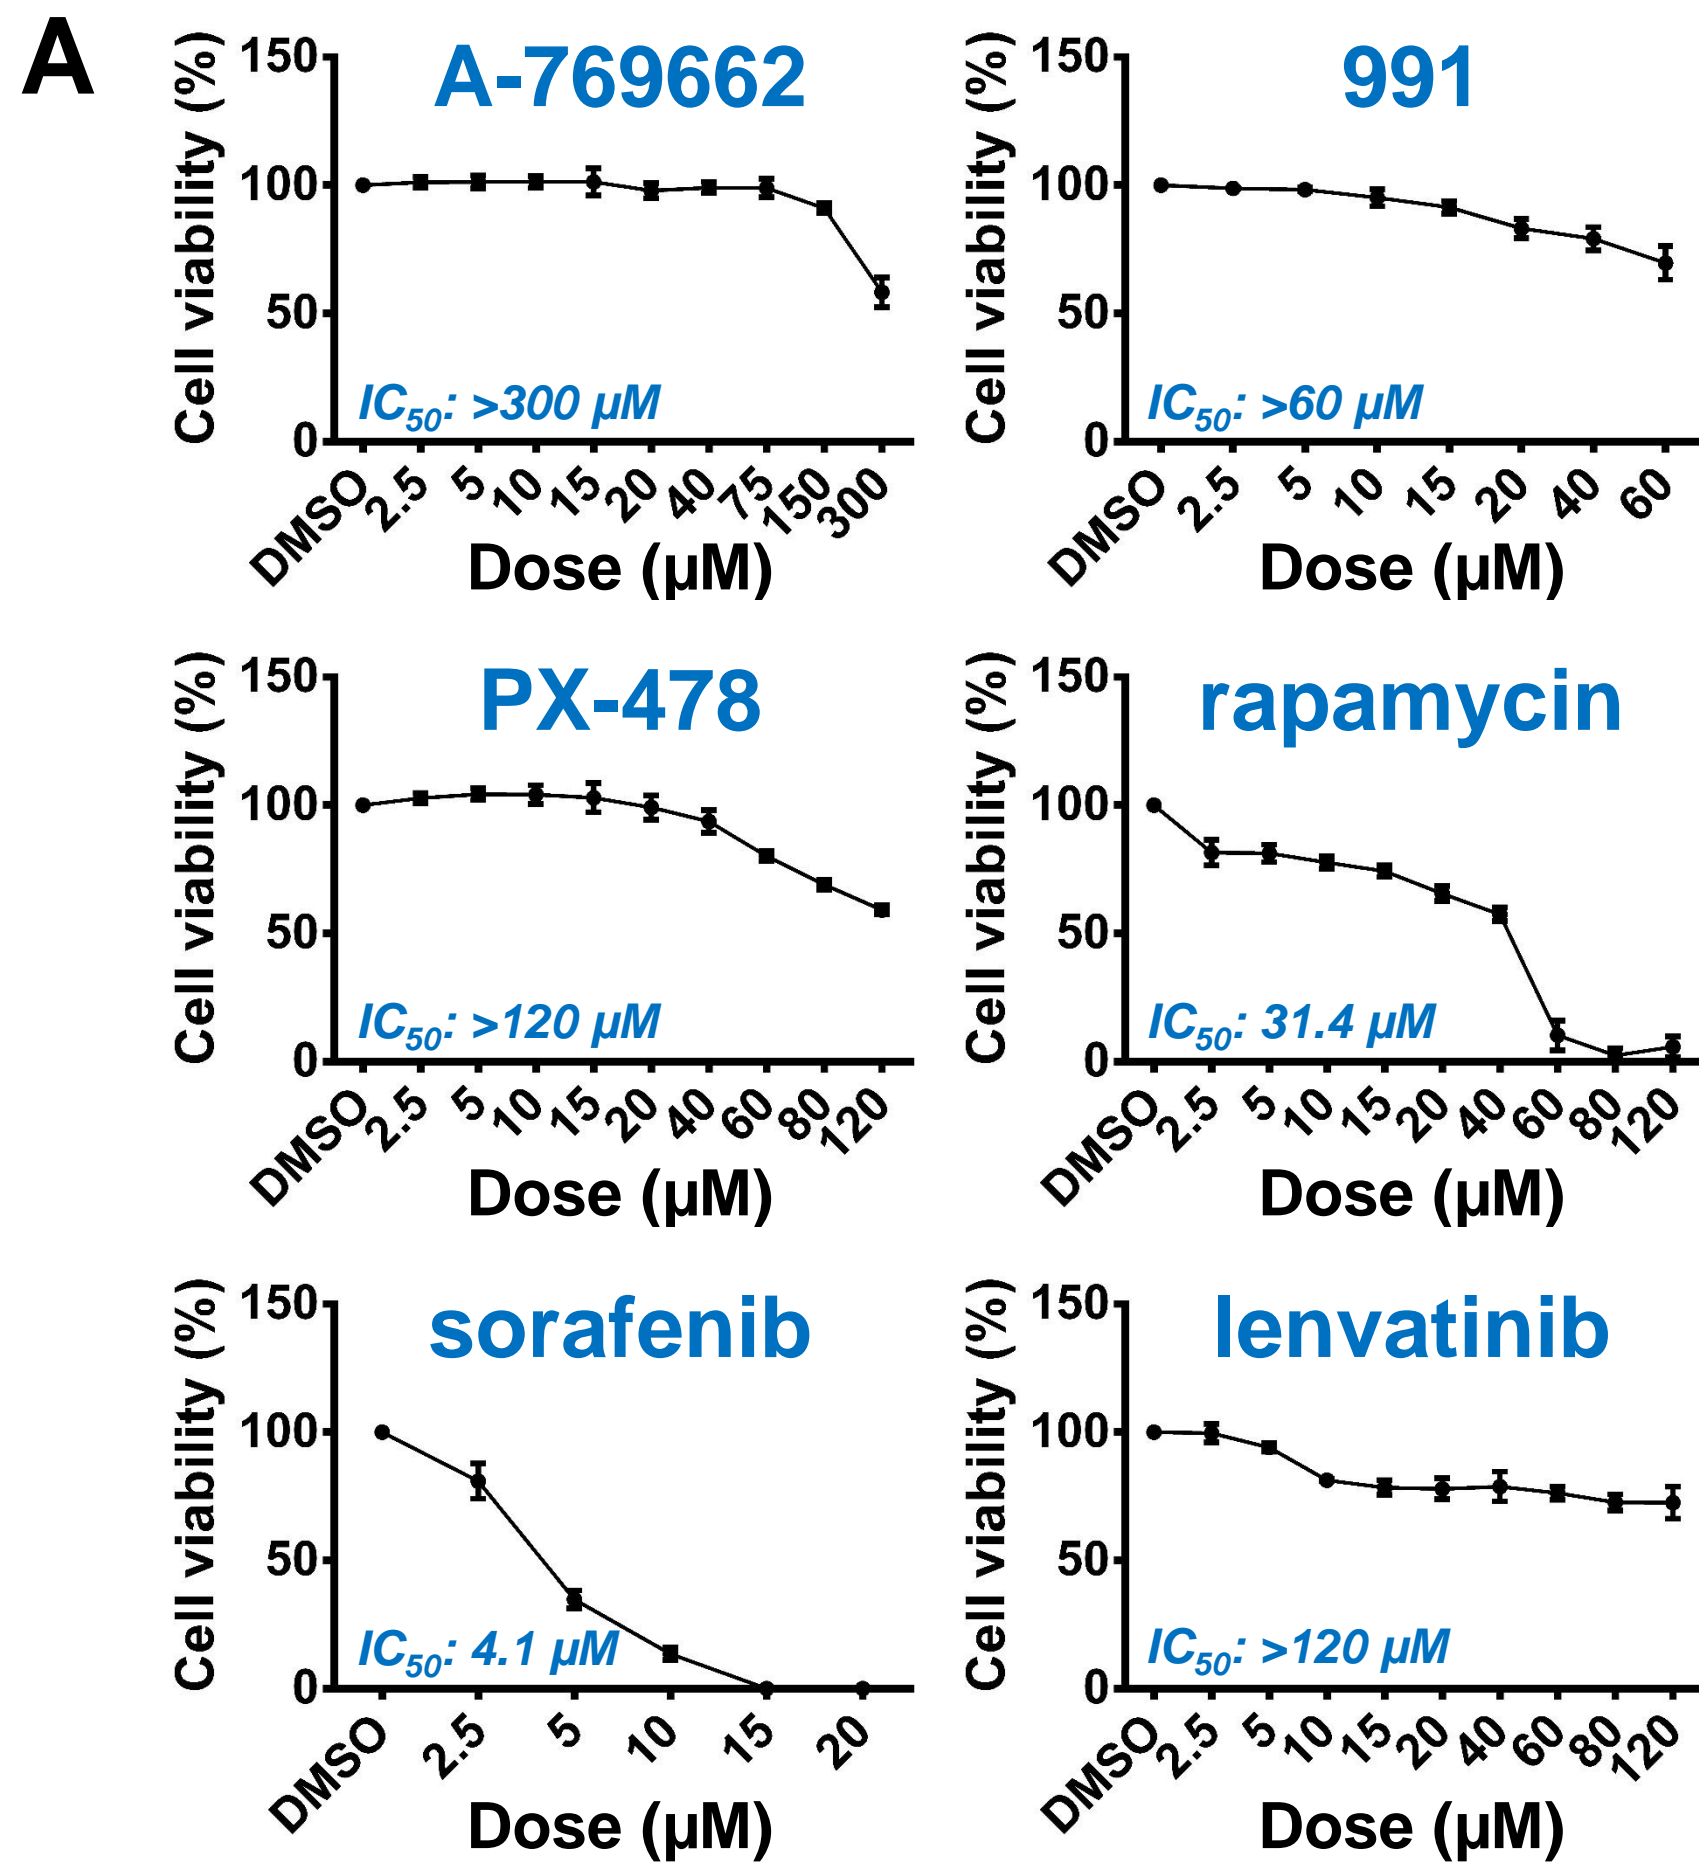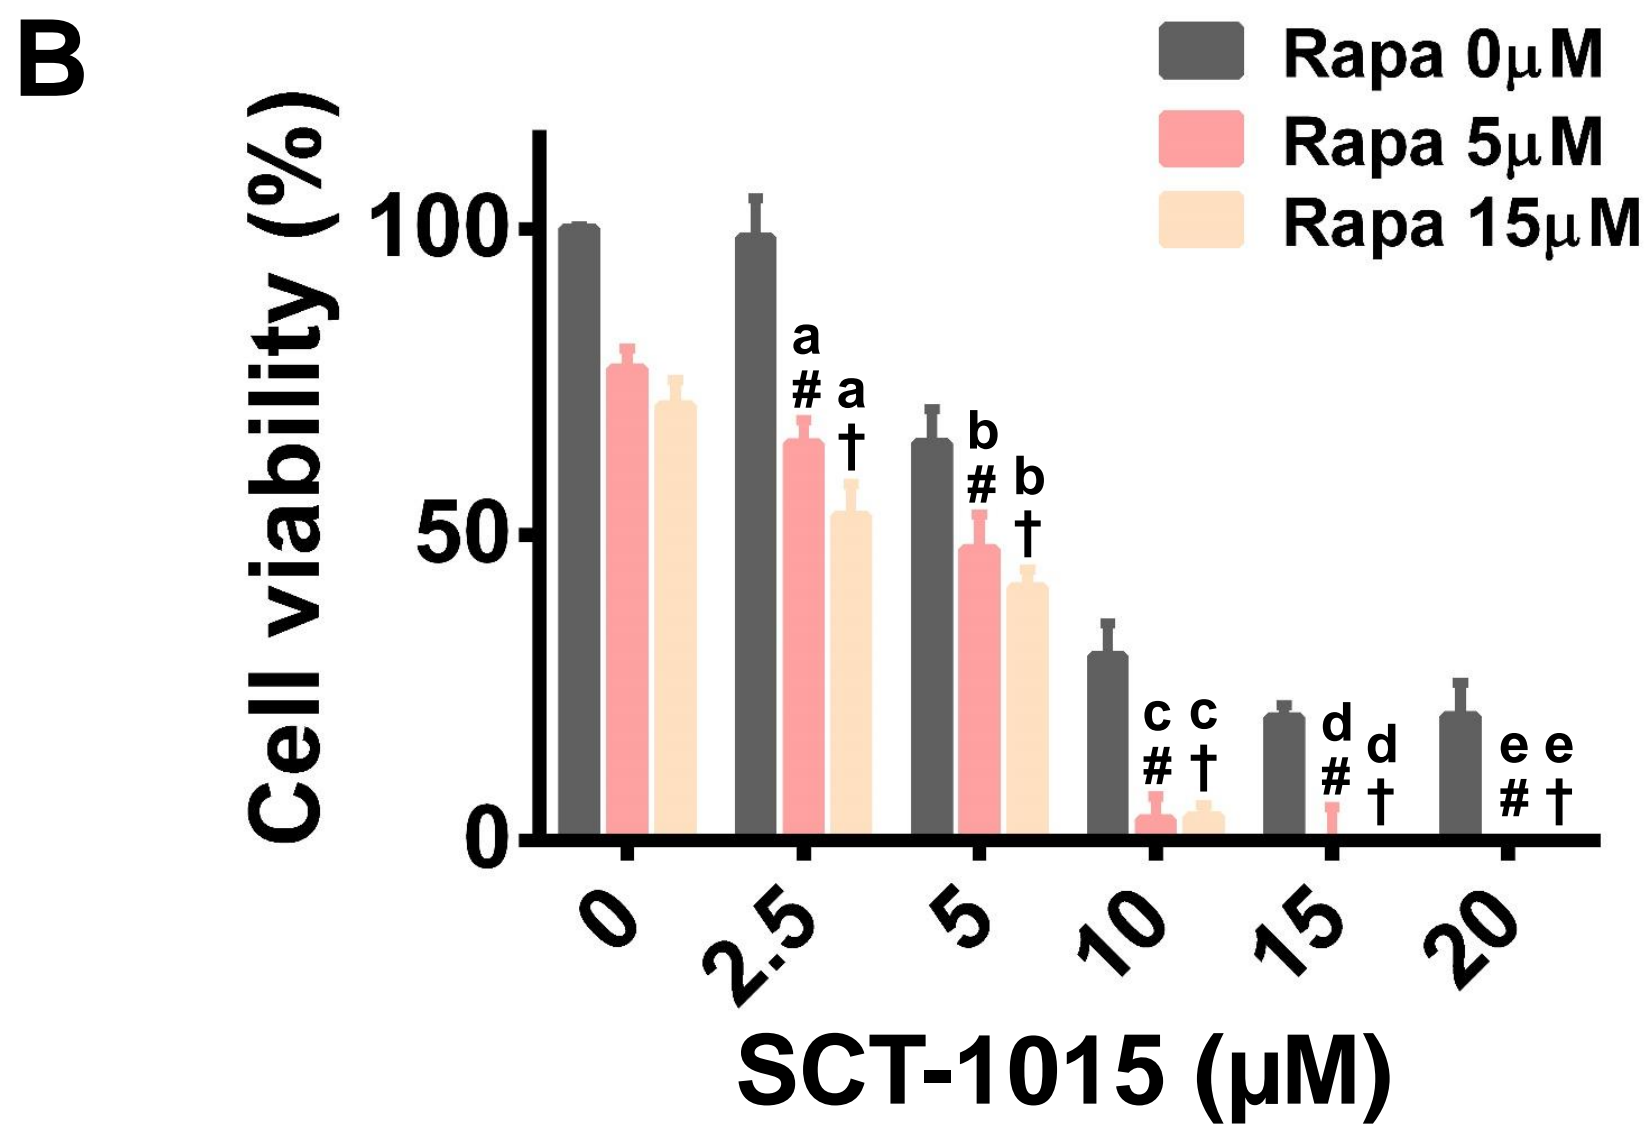

# Supplementary Figure 11

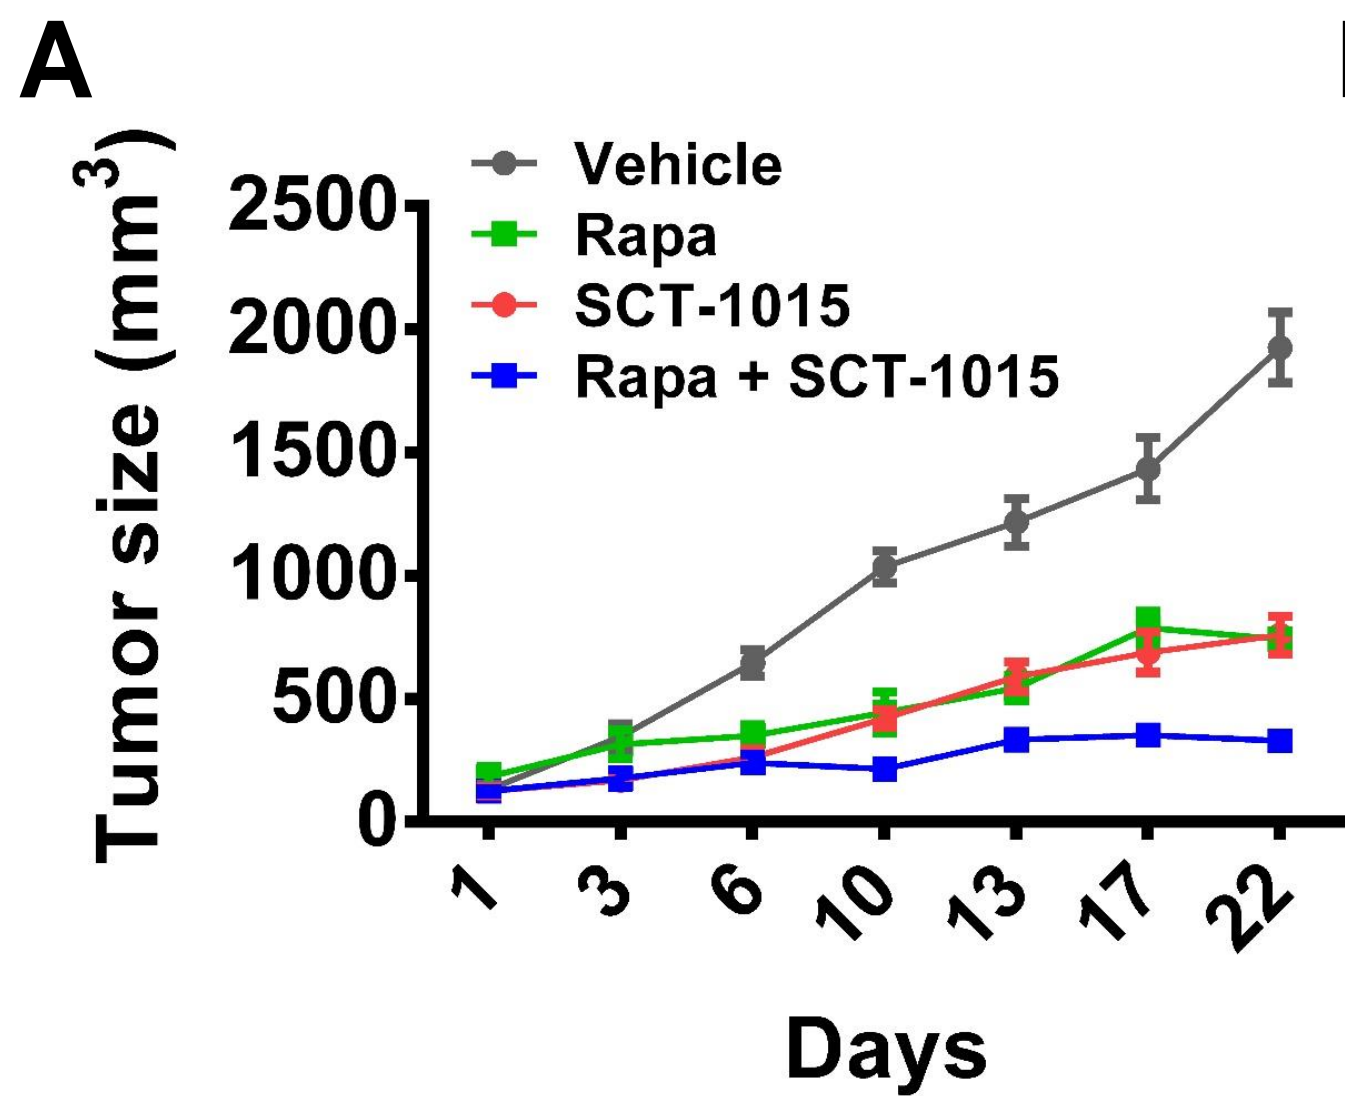

Day 22 Rapa vs. Vehicle ( $p < 0.0001$ )  
SCT-1015 vs. Vehicle ( $p < 0.0001$ )  
Rapa+SCT-1015 vs. Vehicle ( $p < 0.0001$ )  
Rapa vs. Rapa+SCT-1015 ( $p = 0.0107$ )  
SCT-1015 vs. Rapa+SCT-1015 ( $p = 0.0077$ )

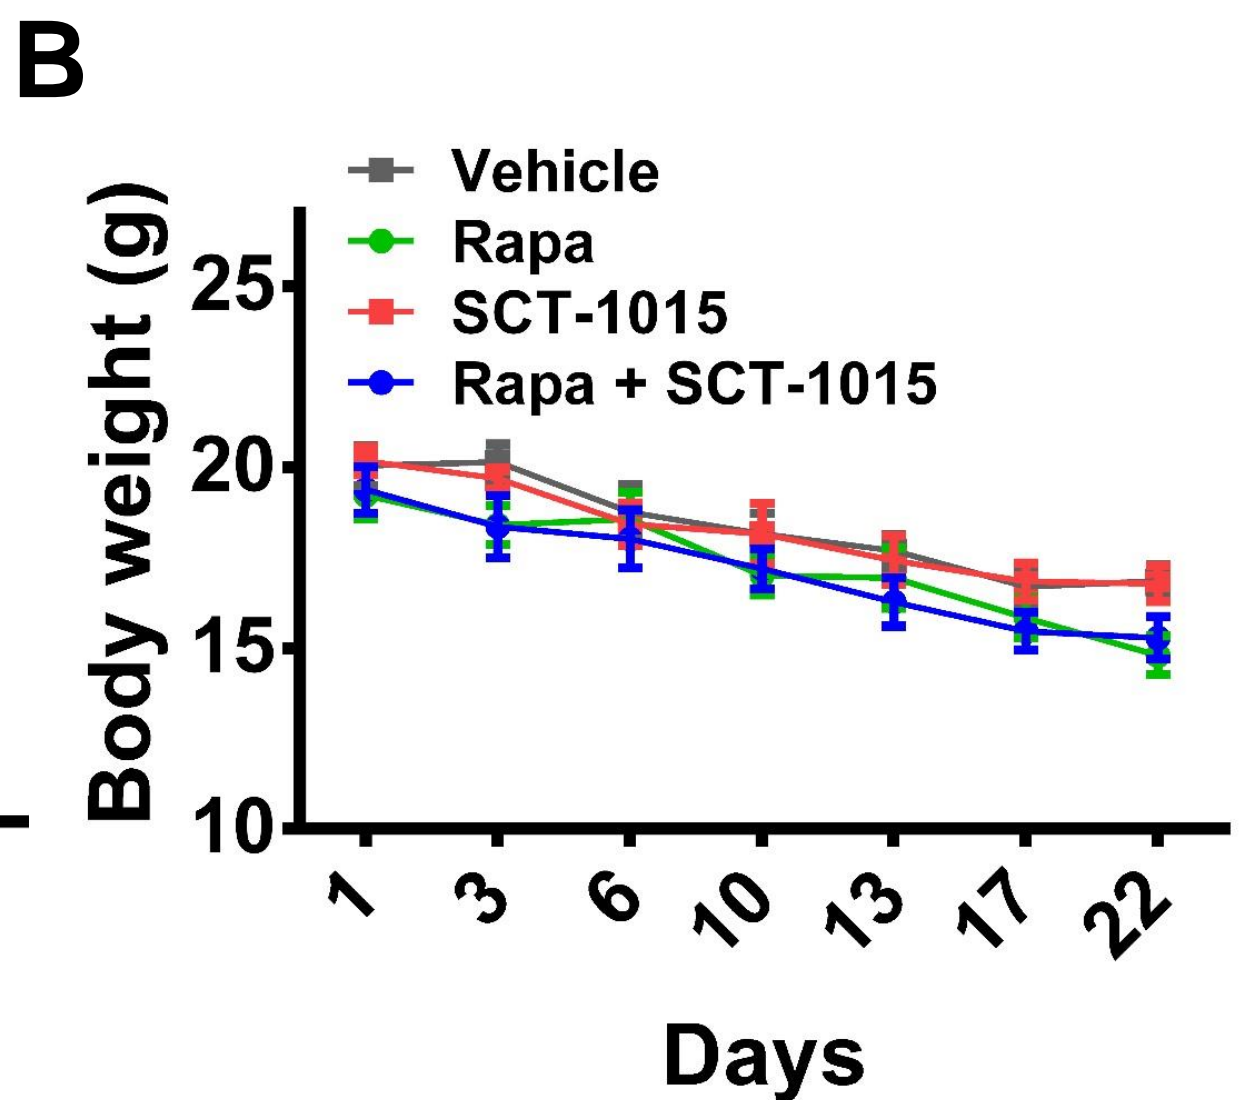

Day 22 Rapa vs. Vehicle ( $p = 0.048$ )  
SCT-1015 vs. Vehicle (N.S.)  
Rapa+SCT-1015 vs. Vehicle (N.S.)  
Rapa vs. Rapa+SCT-1015 (N.S.)  
SCT-1015 vs. Rapa+SCT-1015 (N.S.)

# Supplementary Figure 12

**A**

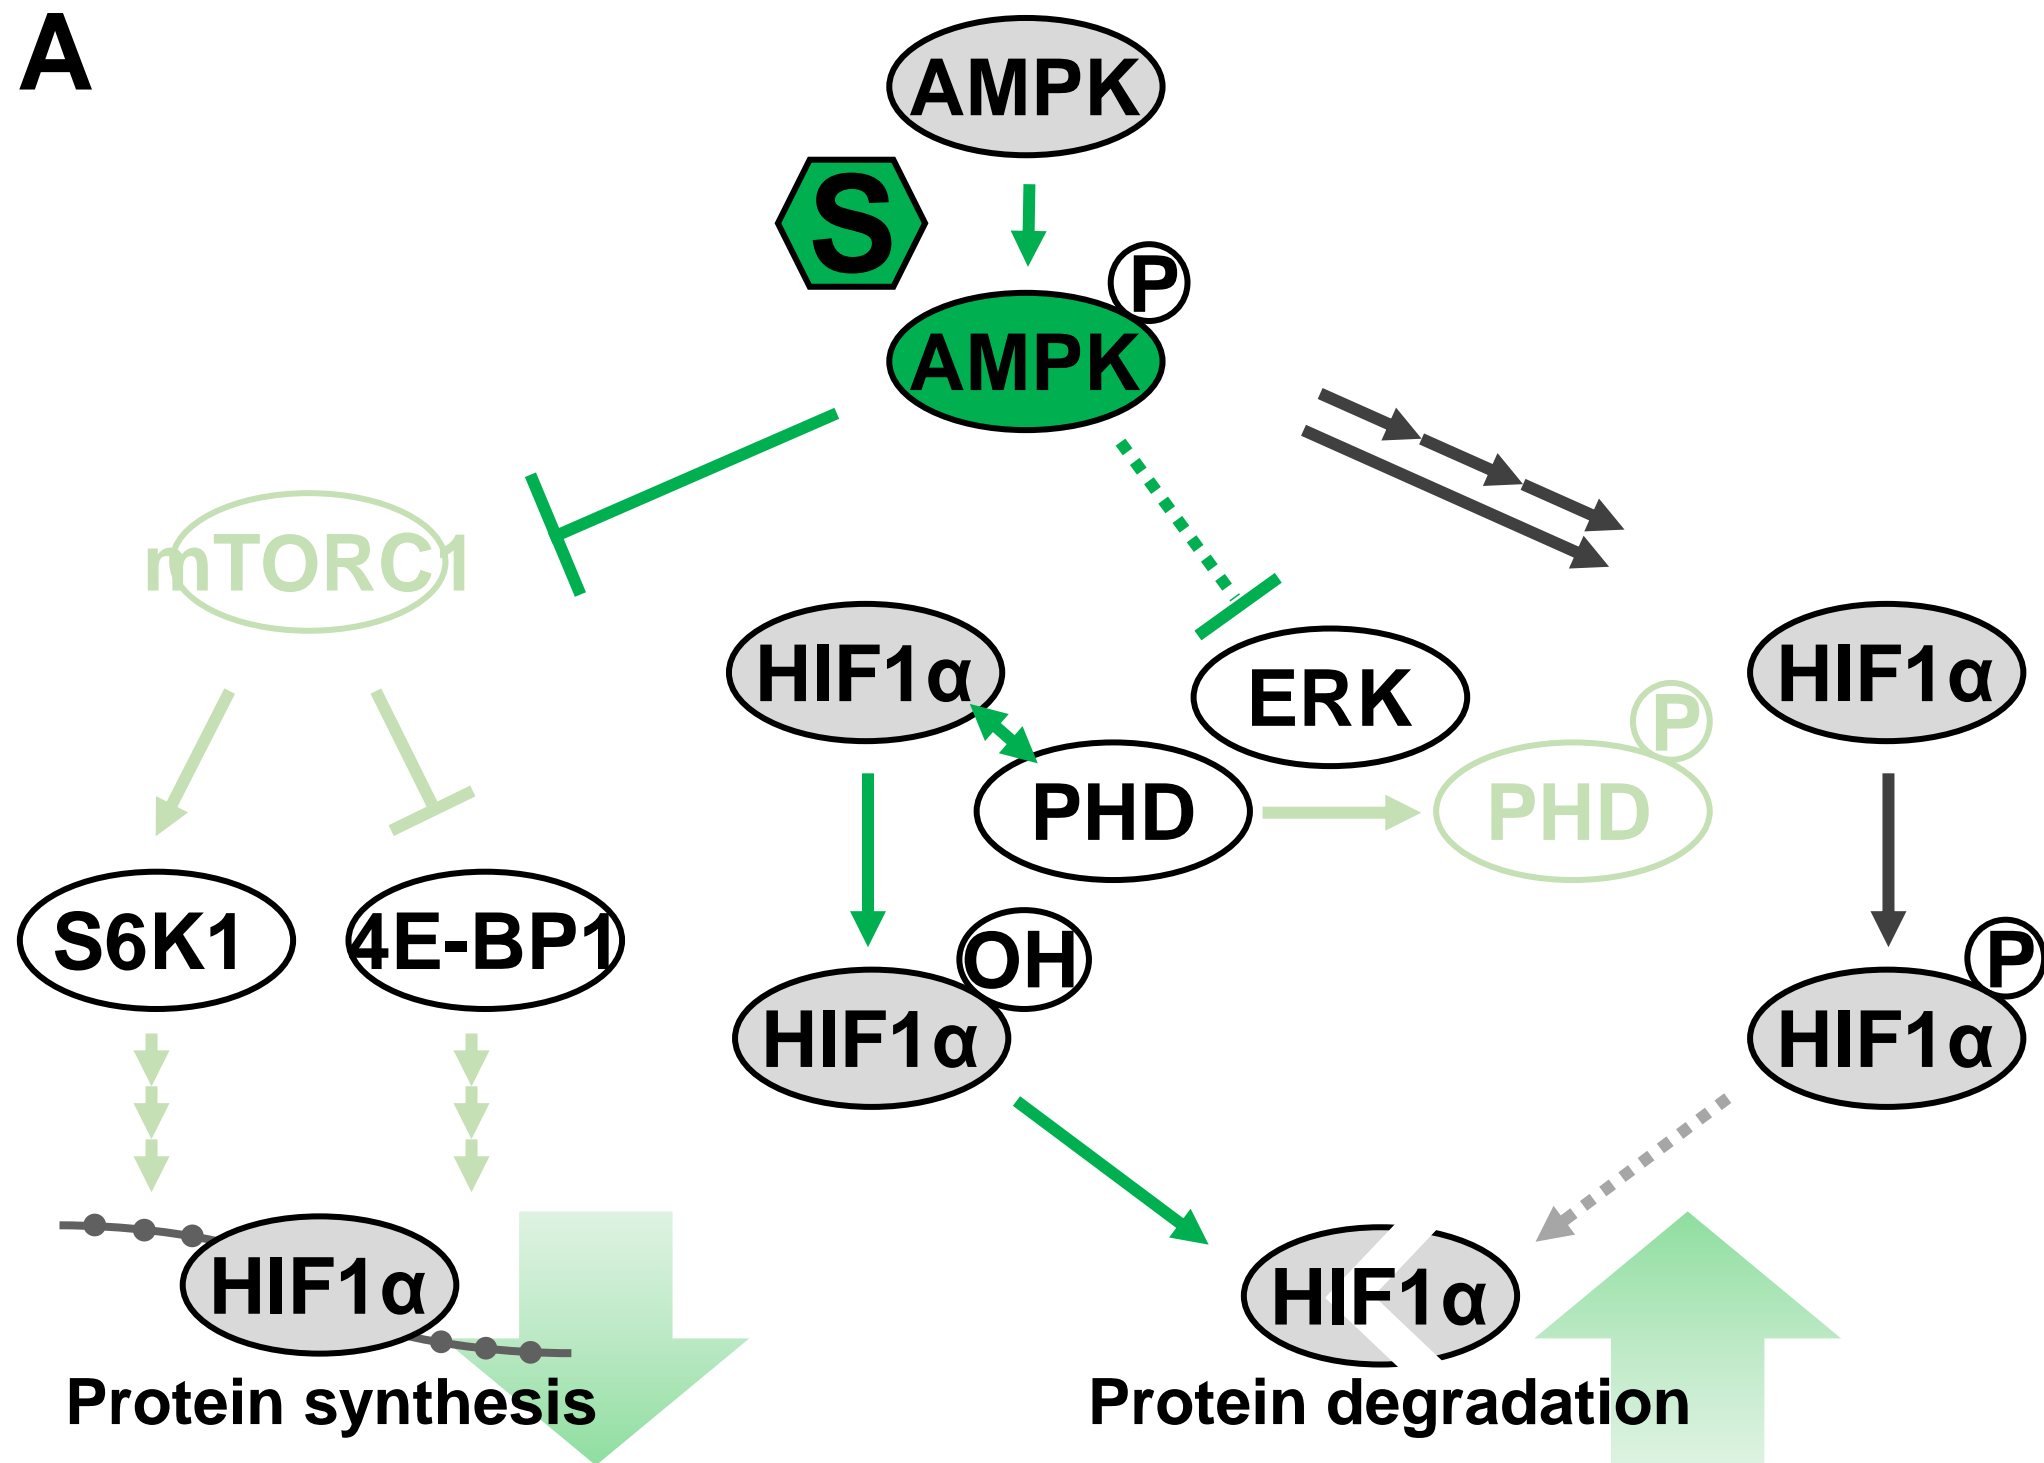

**B**

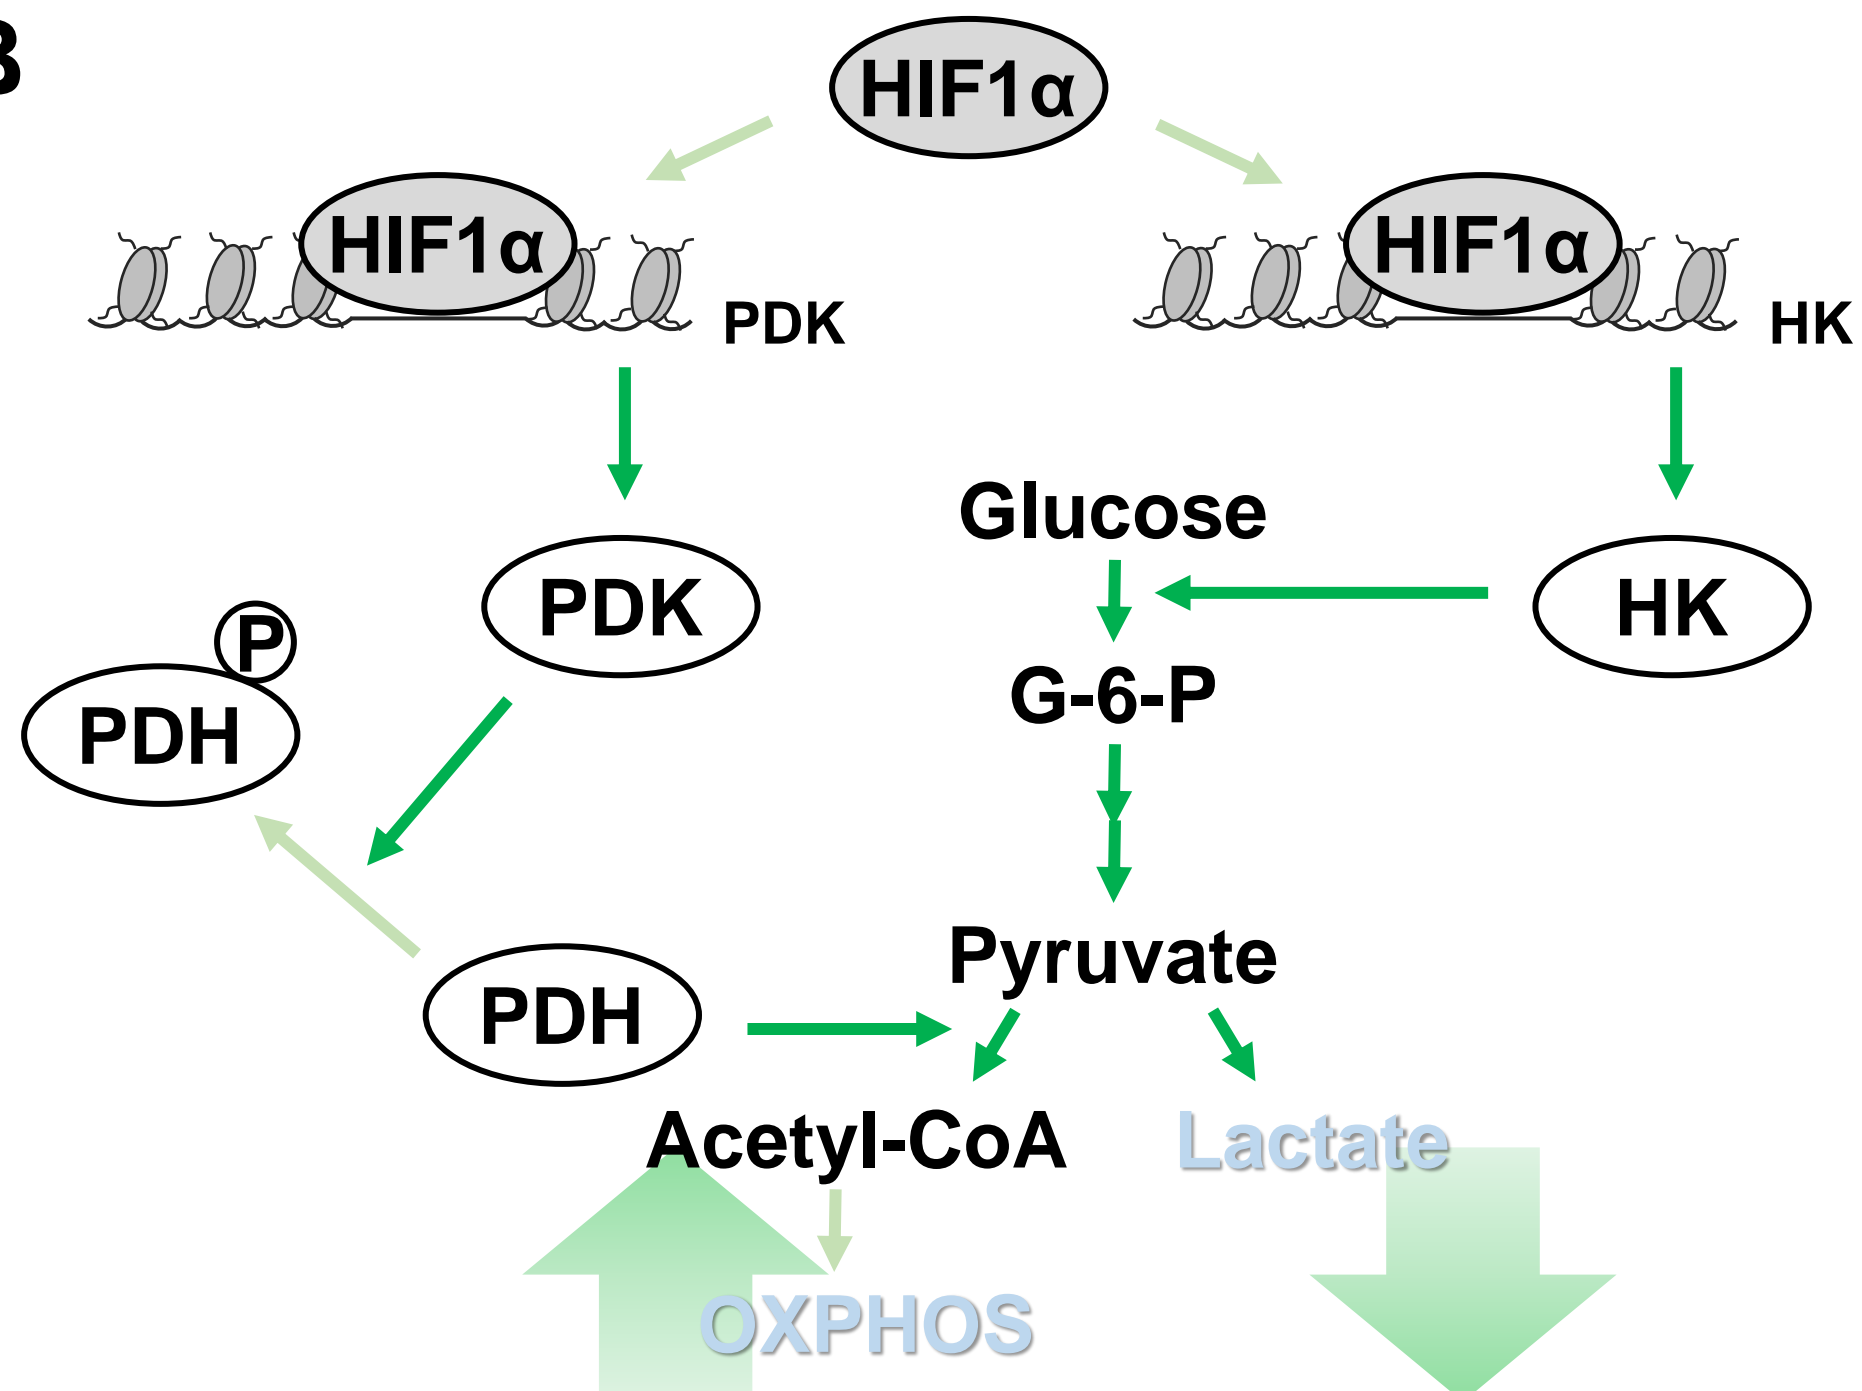

Supplement: MOL2-16-2274-s001.pdf [file MOL2-16-2274-s001.pdf]
